# Supplementary material for: Human Impact on the Twenty-Four-Hour Patterns of Steller Sea Lions’ Use of a Haulout in Hokkaido, Japan
Source: MDPI journal article supplement (doi:10.3390/ani14091312), 2024-04-27
Supplement: s1 [file s1]

Table S1. The annual fishery damages caused by Steller sea lions in the Ishikari area, Shiribeshi area, and whole Hokkaido.

|            | 2009      | 2010      | 2011      | 2012      | 2013      | 2014      | 2015      | 2016      | 2017      | 2018      | 2019      |
|------------|-----------|-----------|-----------|-----------|-----------|-----------|-----------|-----------|-----------|-----------|-----------|
| Hokkaido   | 1,385,713 | 1,354,132 | 1,607,914 | 1,497,723 | 1,612,351 | 1,978,570 | 1,773,616 | 1,869,862 | 1,597,697 | 1,178,699 | 1,006,180 |
| Ishikari   | 296,212   | 206,221   | 228,441   | 211,548   | 149,522   | 167,283   | 201,239   | 233,392   | 254,435   | 187,745   | 206,663   |
| Shiribeshi | 262,705   | 499,178   | 490,945   | 457,089   | 495,469   | 628,180   | 517,175   | 582,175   | 399,230   | 227,354   | 166,338   |

The top row indicates years.

The number in the row indicates the amount of fishery damage (Yen in thousands) of each area by Steller sea lions, mainly from January to March

Left column: Hokkaido indicates the whole Hokkaido area; Ishikari indicates the main area where the haulout, “Todo Iwa,” is located; Shiribeshi indicates the next area of Ishikari
