# Supplementary material for: Human Impact on the Twenty-Four-Hour Patterns of Steller Sea Lions’ Use of a Haulout in Hokkaido, Japan
Source: MDPI journal article supplement (doi:10.3390/ani14091312), 2024-04-27
Supplement: s1 [file s1]

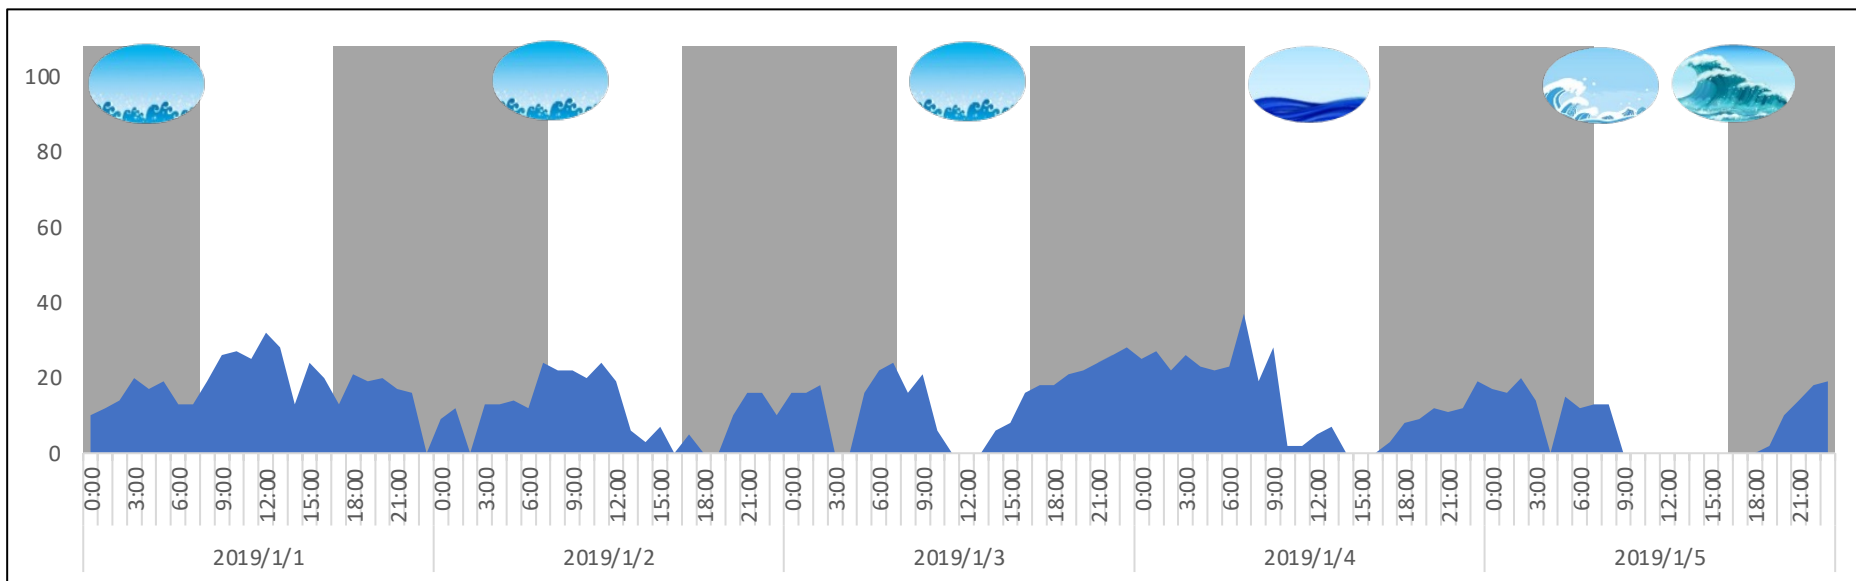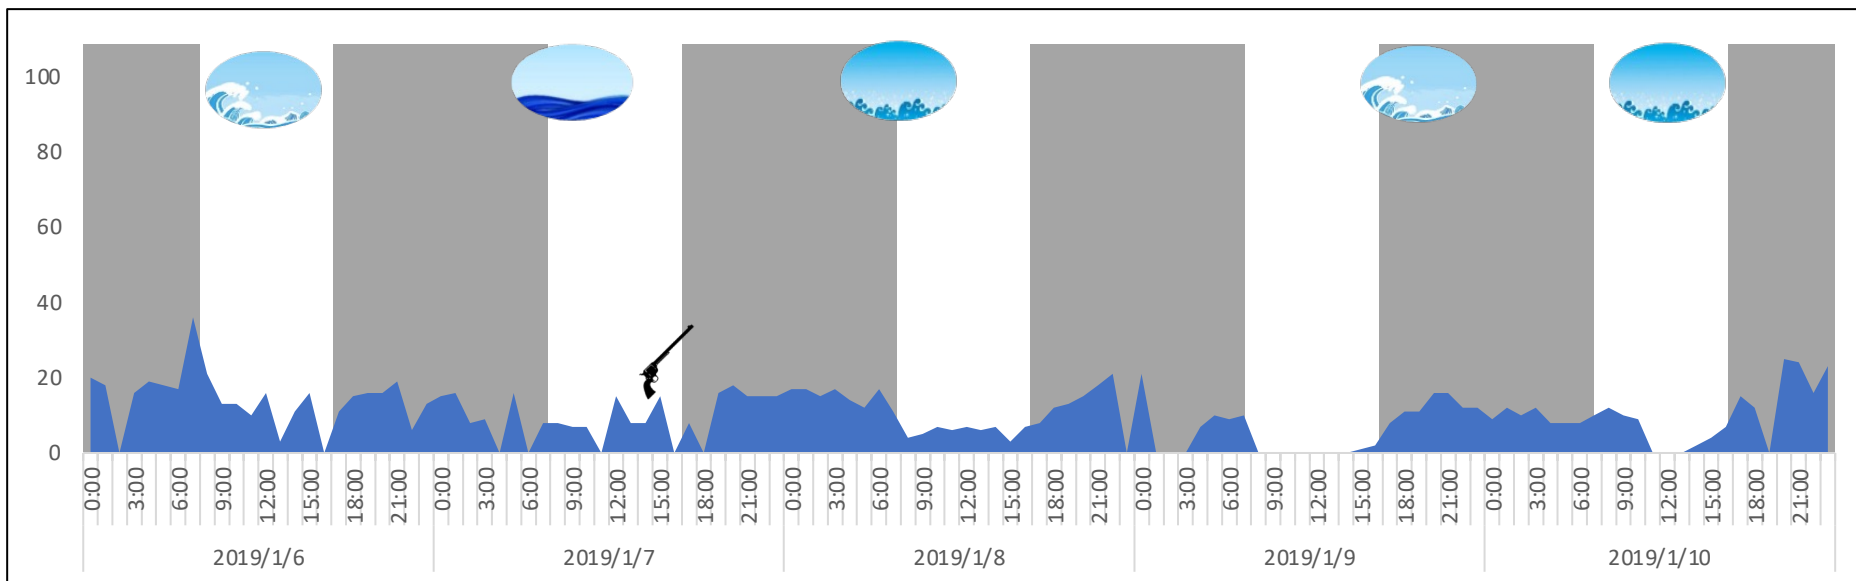

 : SSL's head   
  : Human   
  : Boat   
 Wave Height:  Low   
  Middle   
  High   
  Extreme  
 : Night   
 : Shooting   
 : Kayak   
 (Submerge the haulout site)

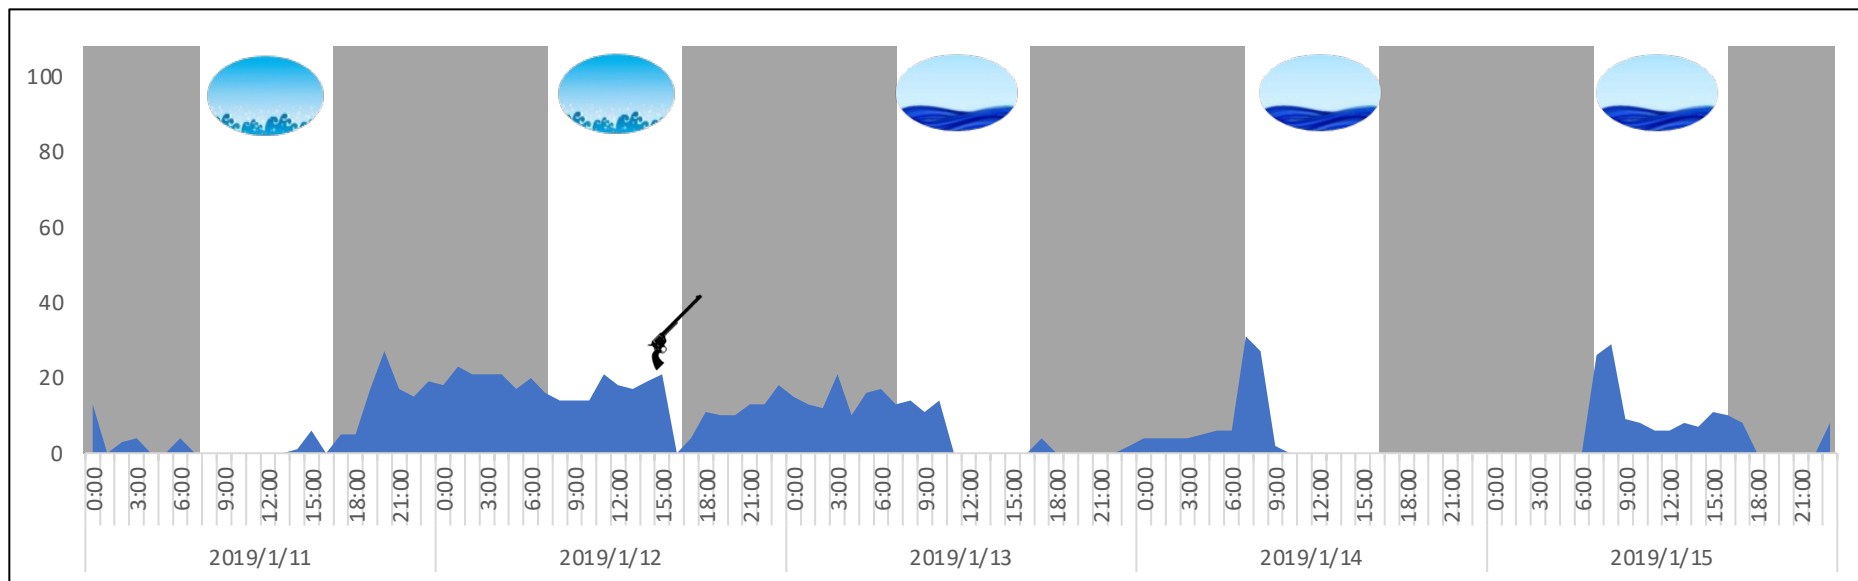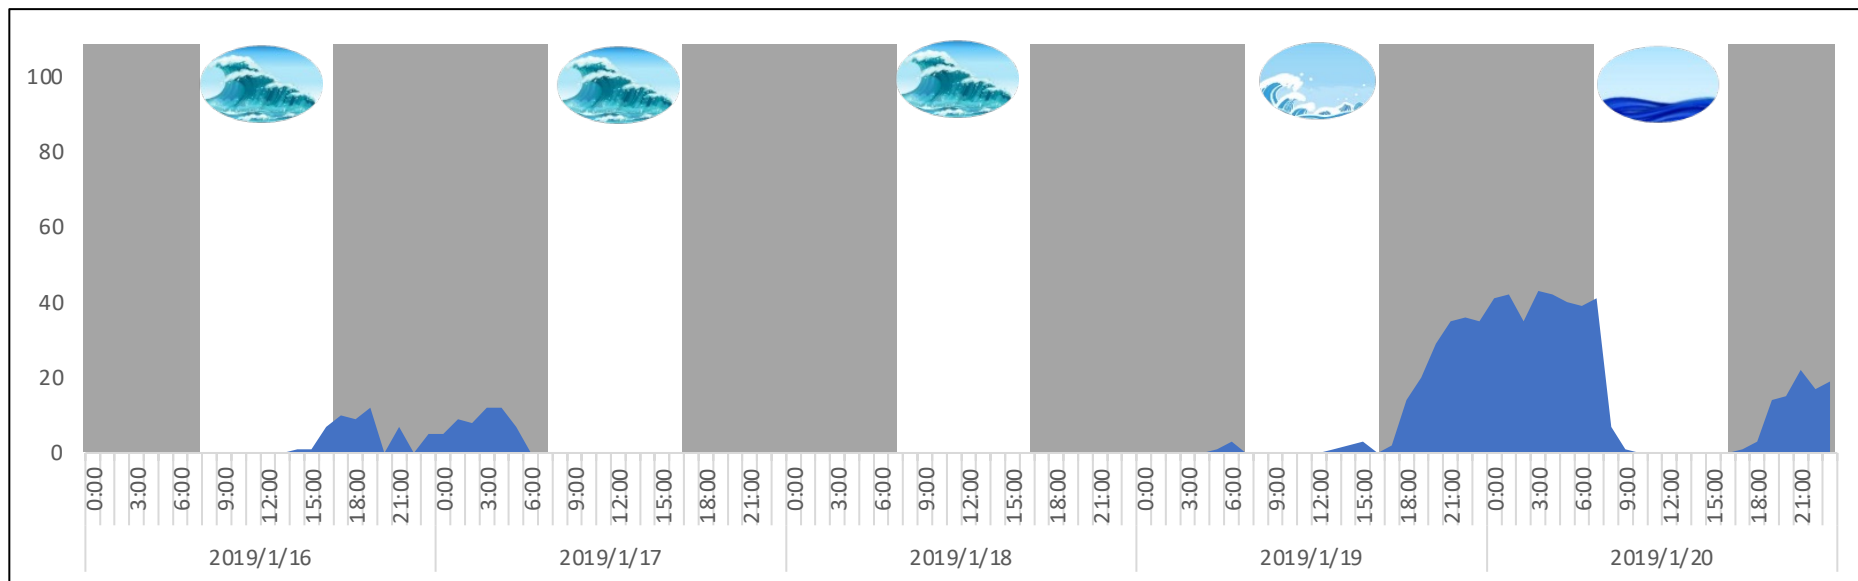

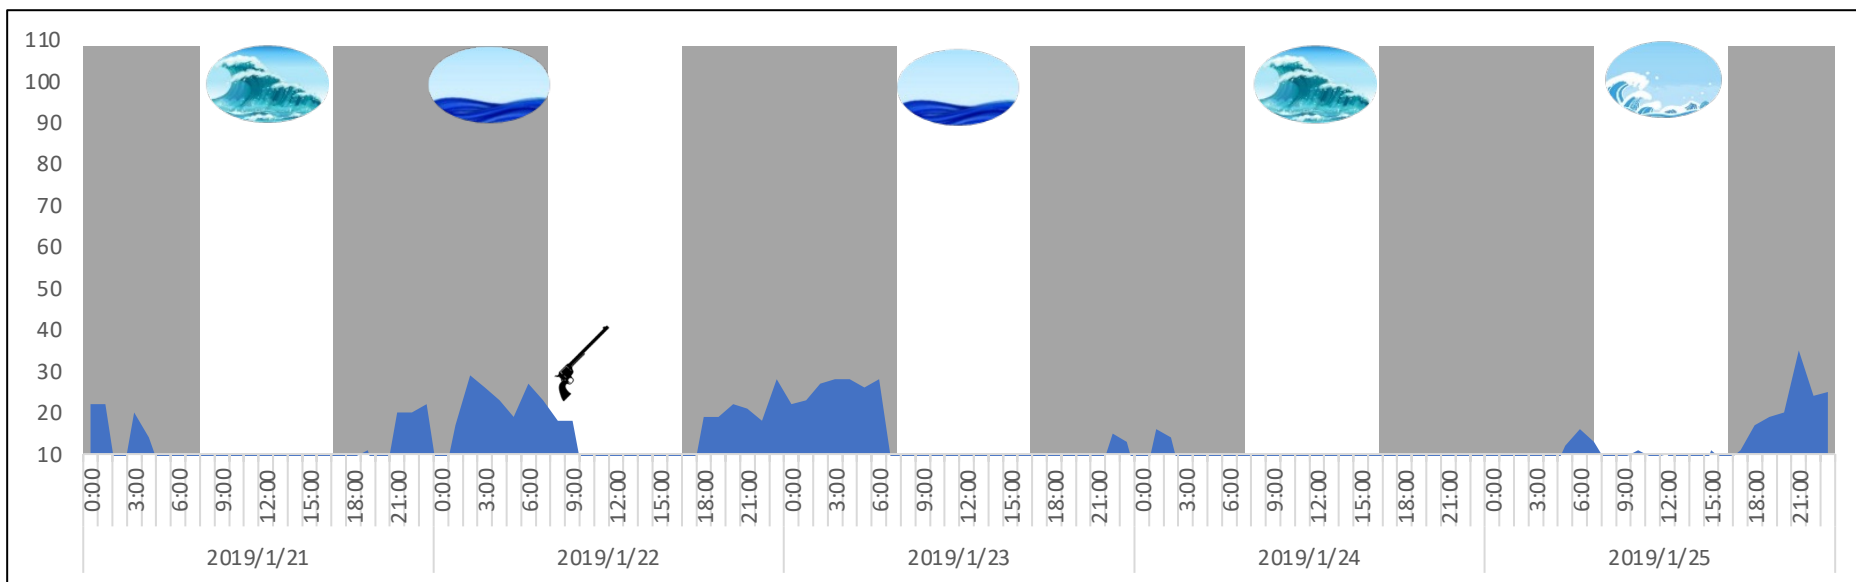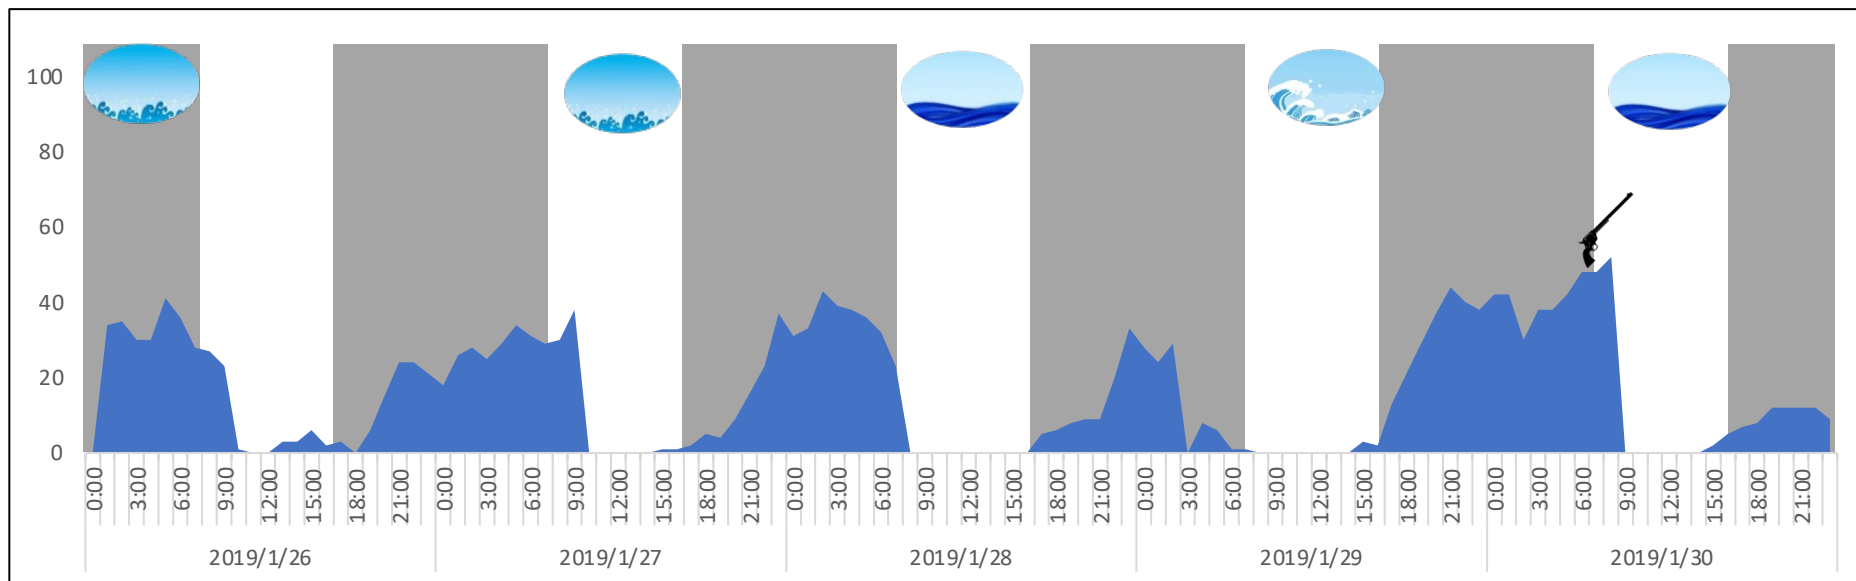

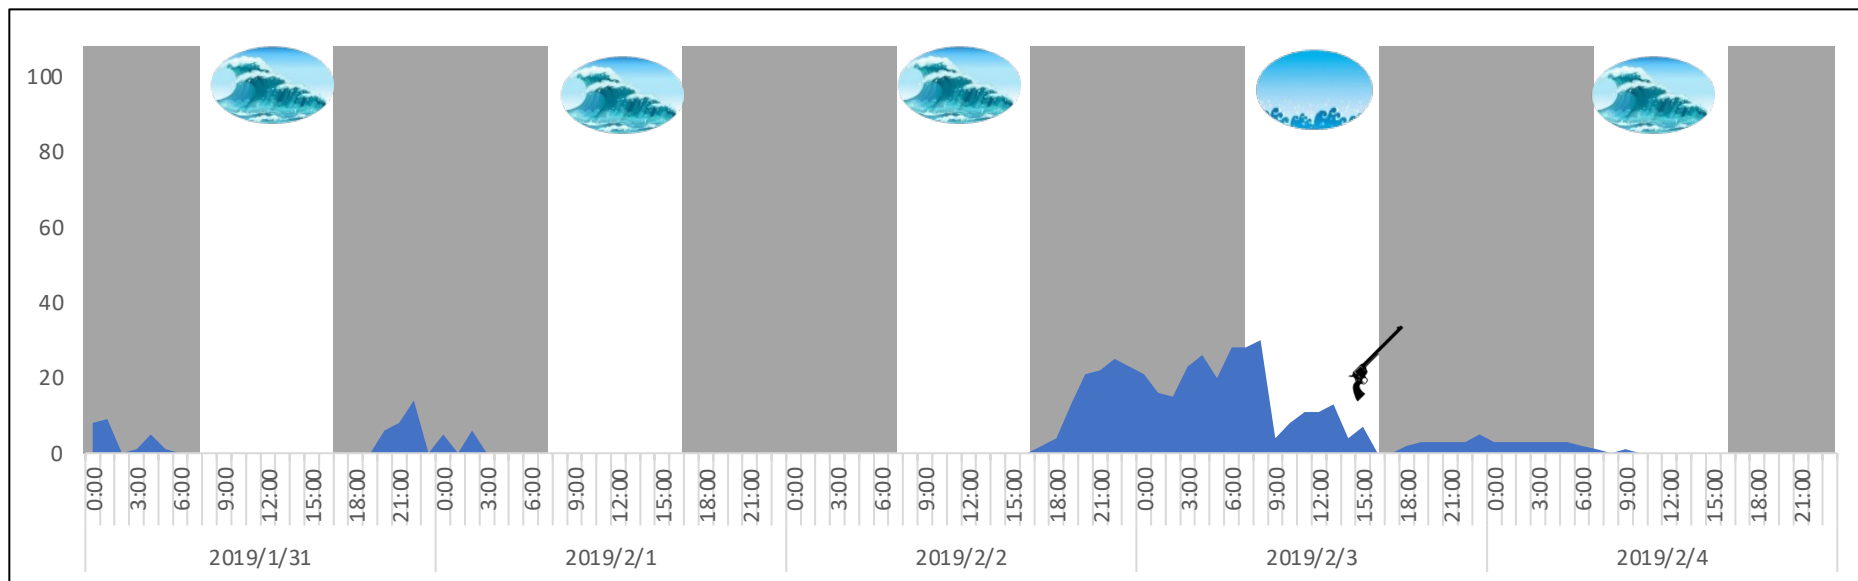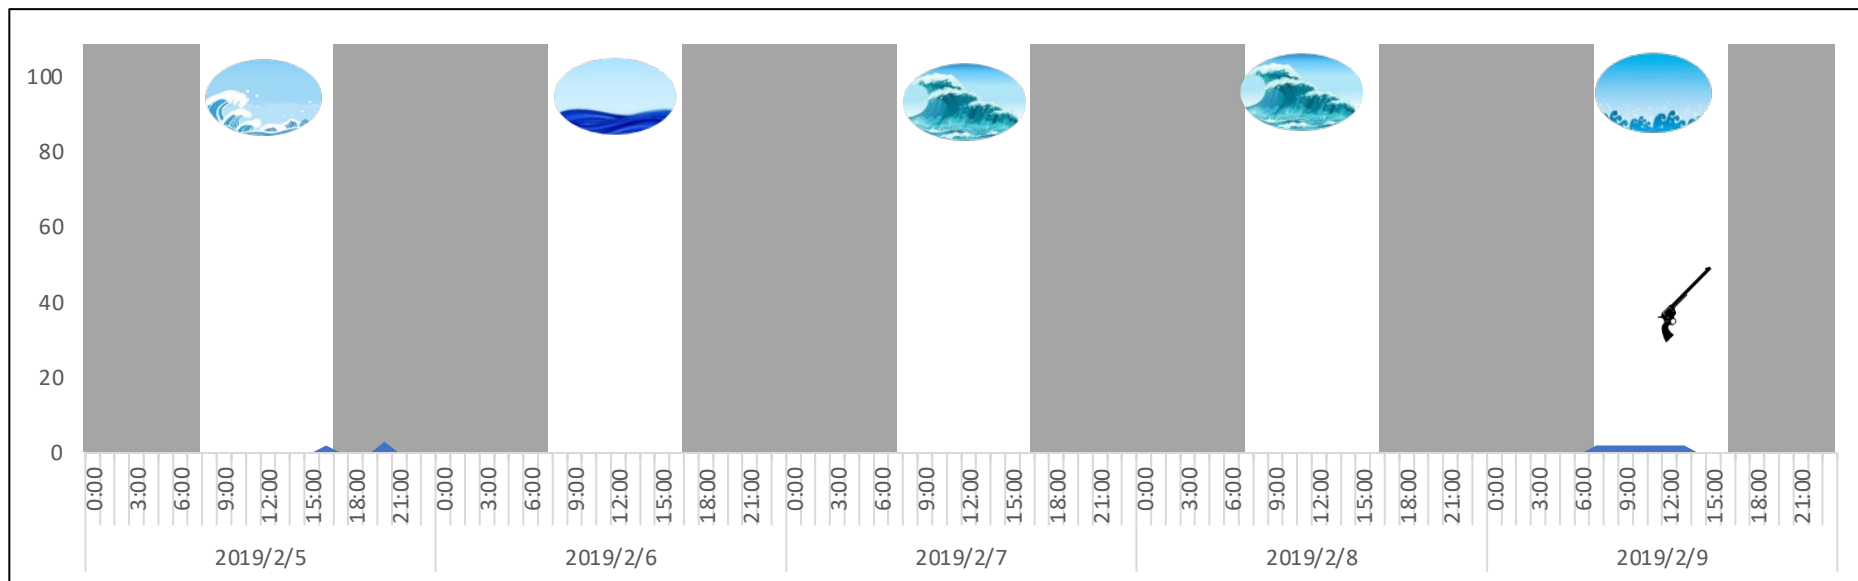

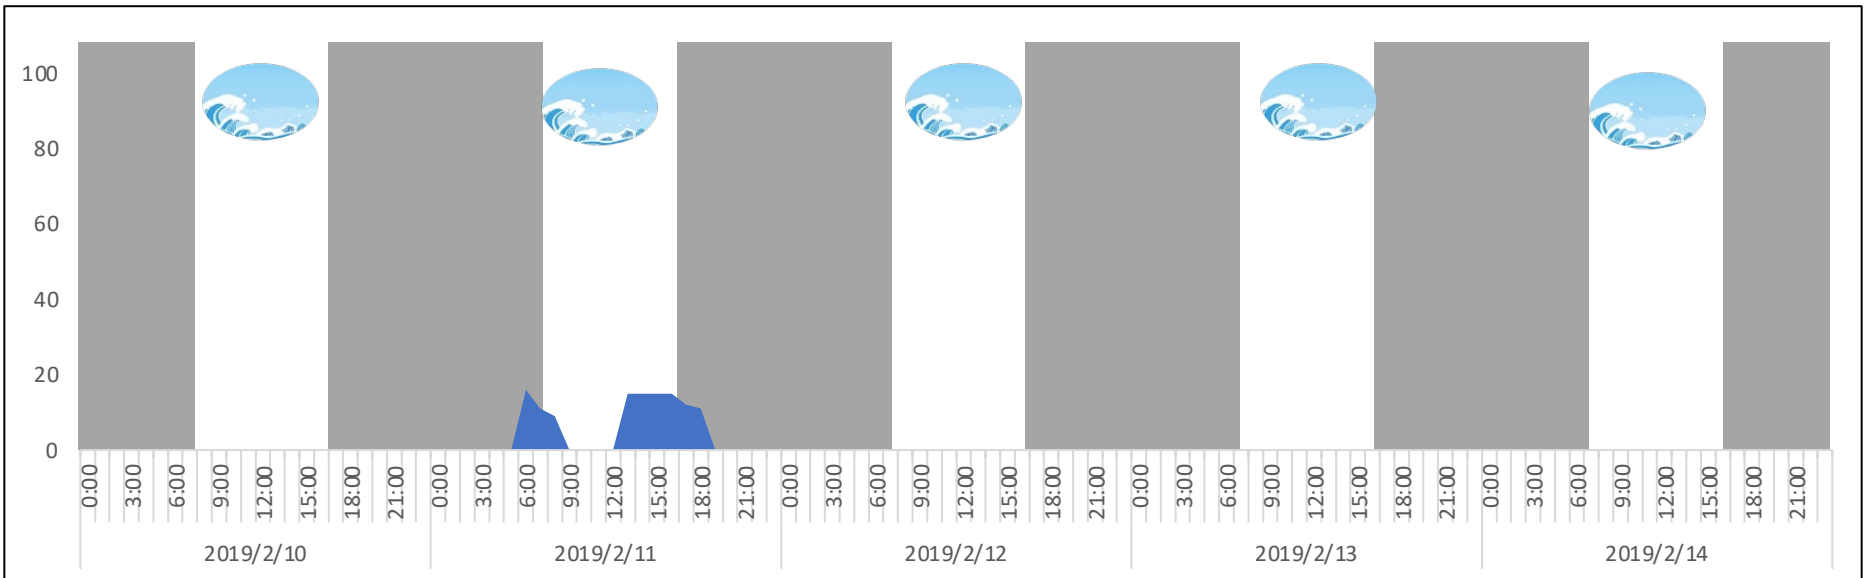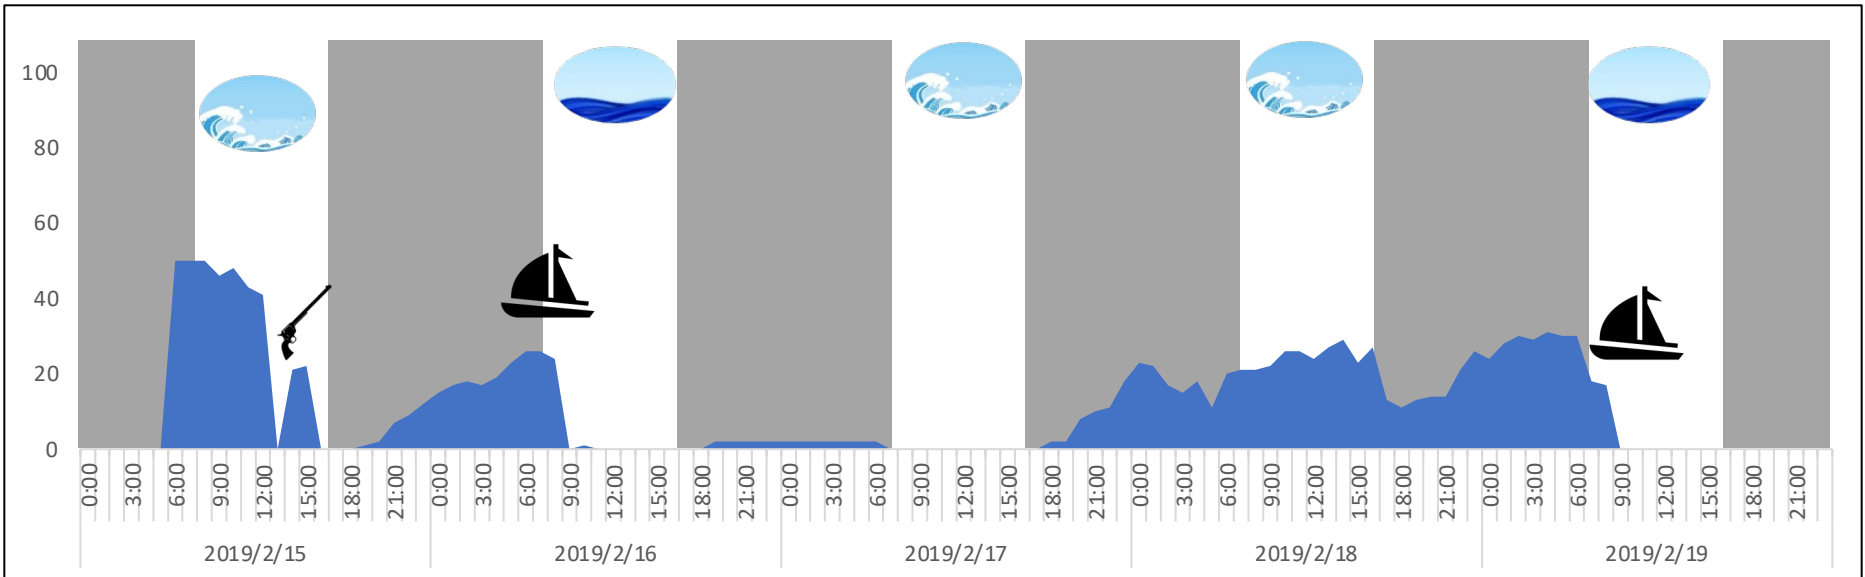

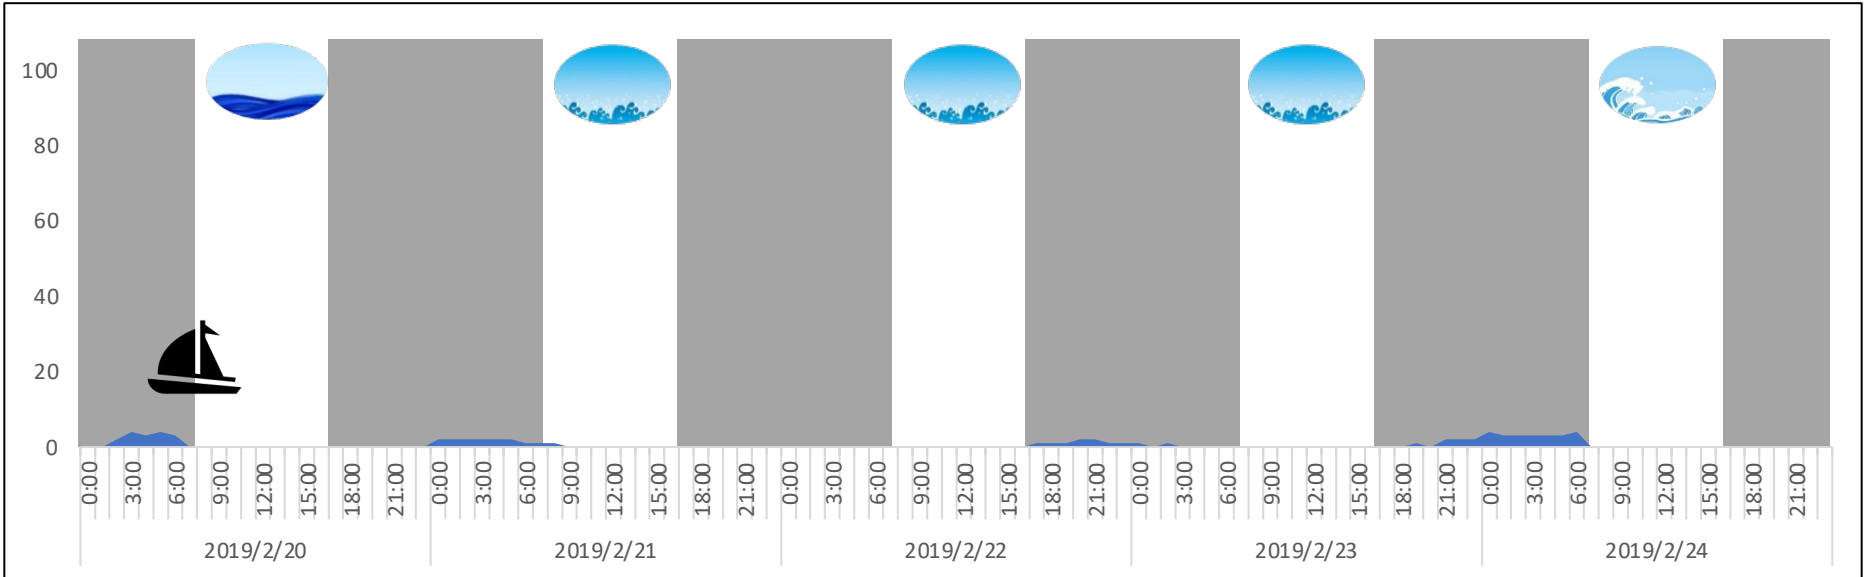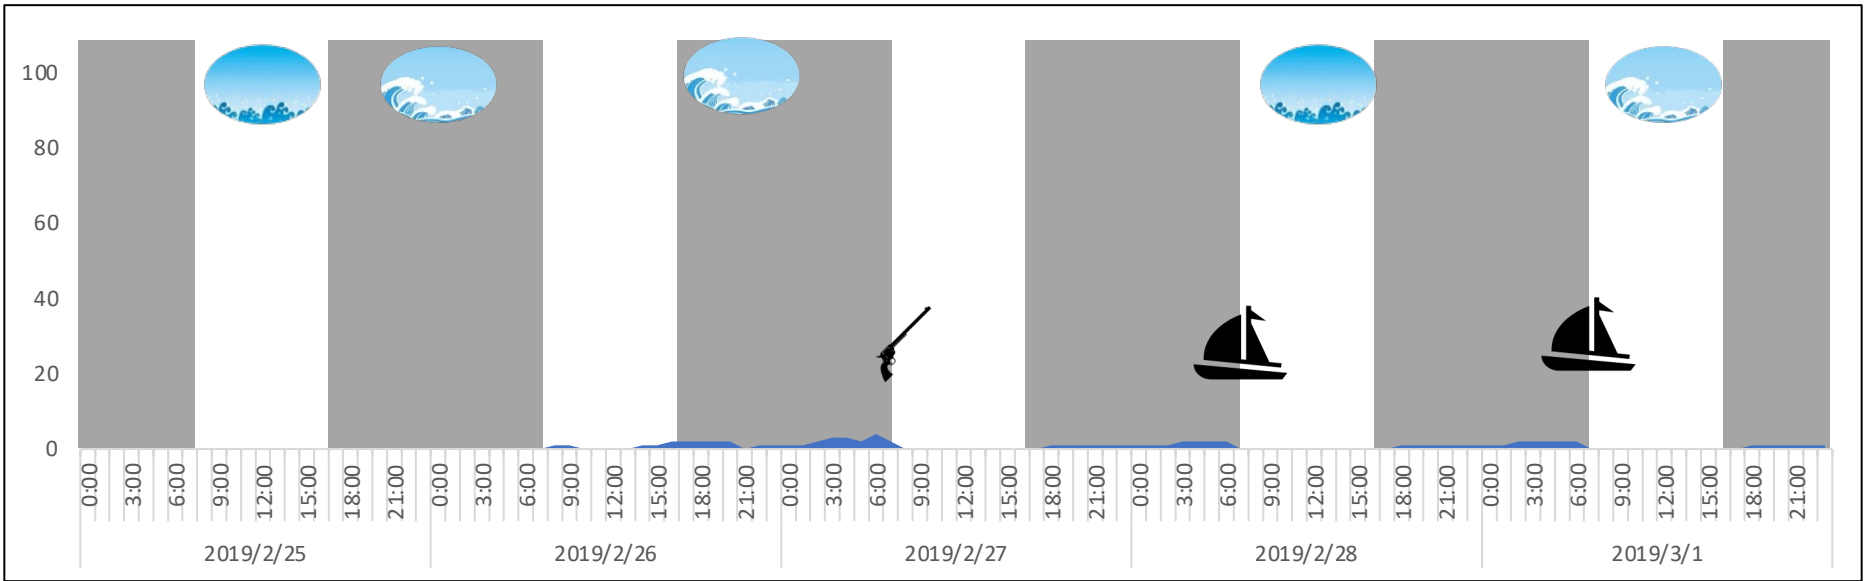

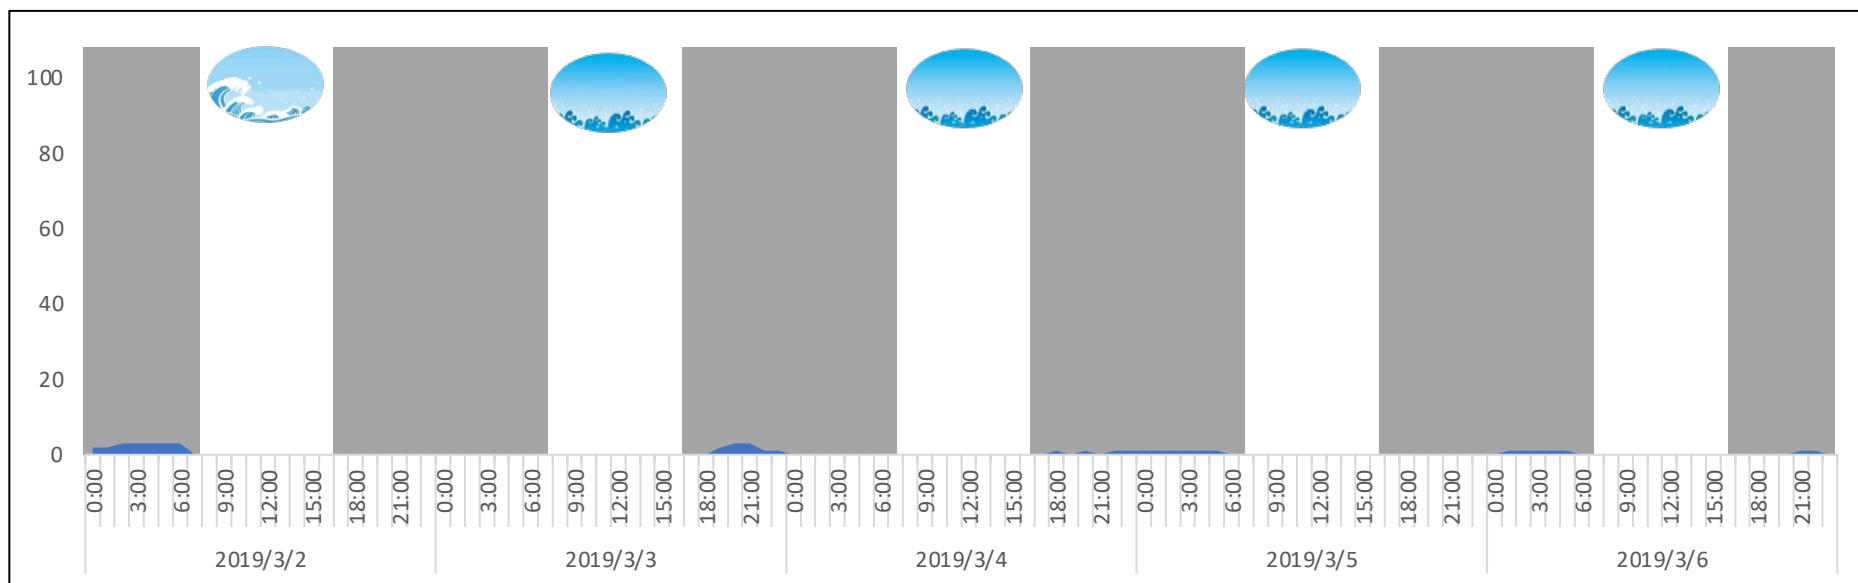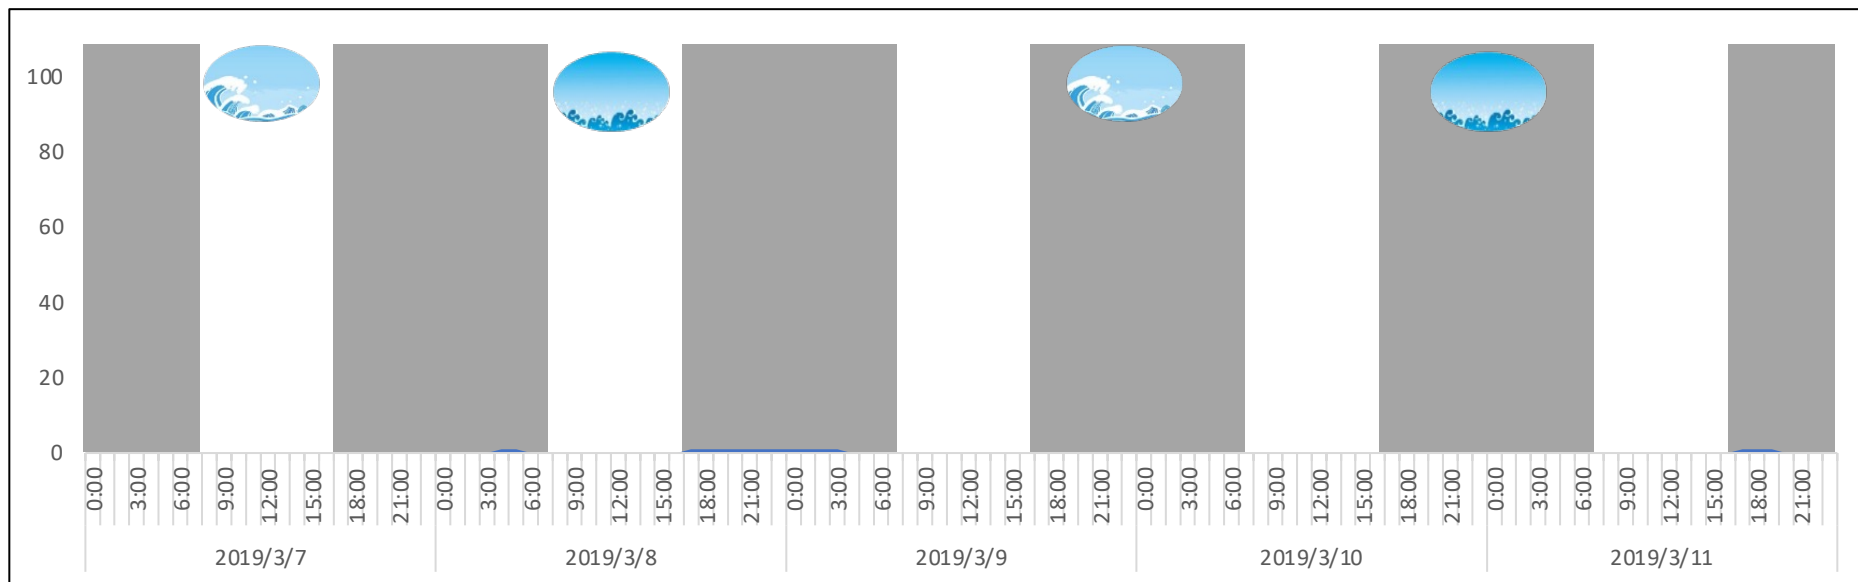

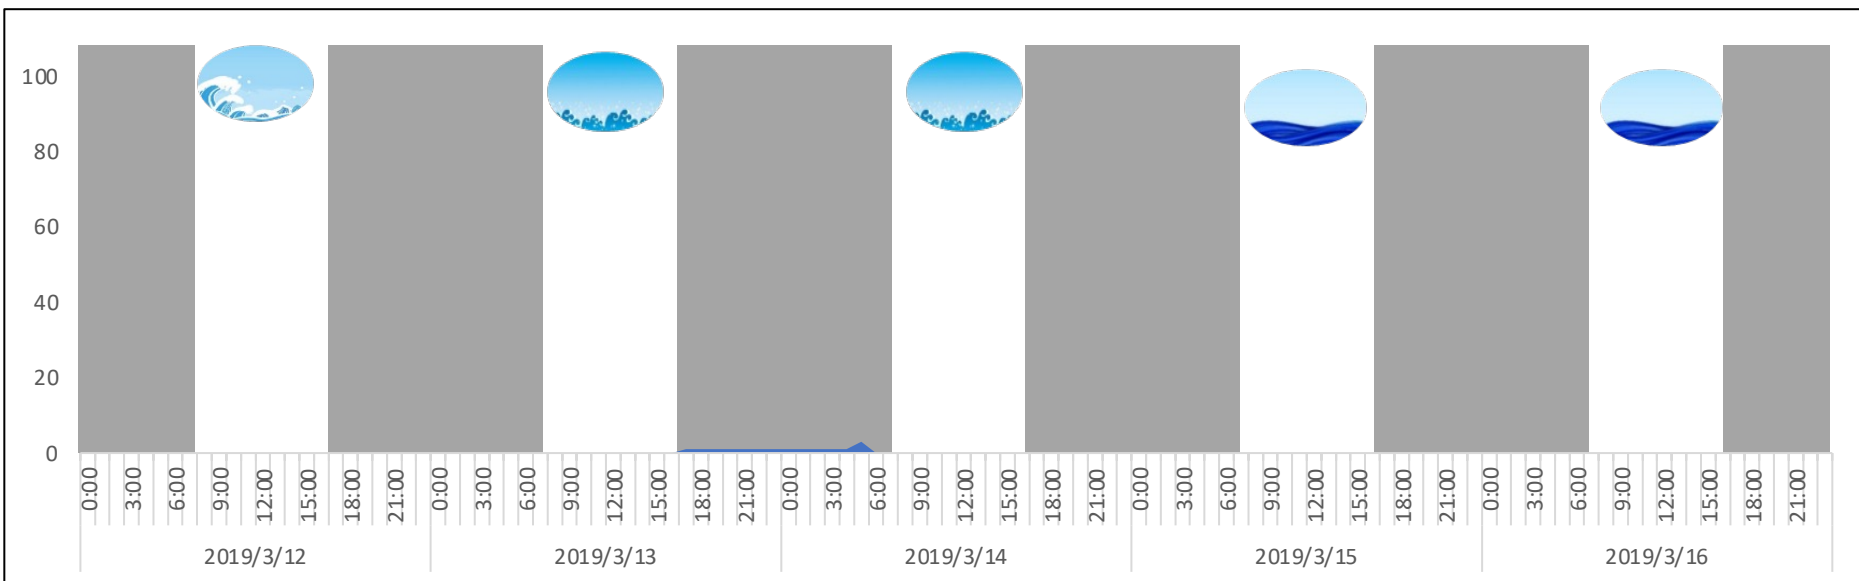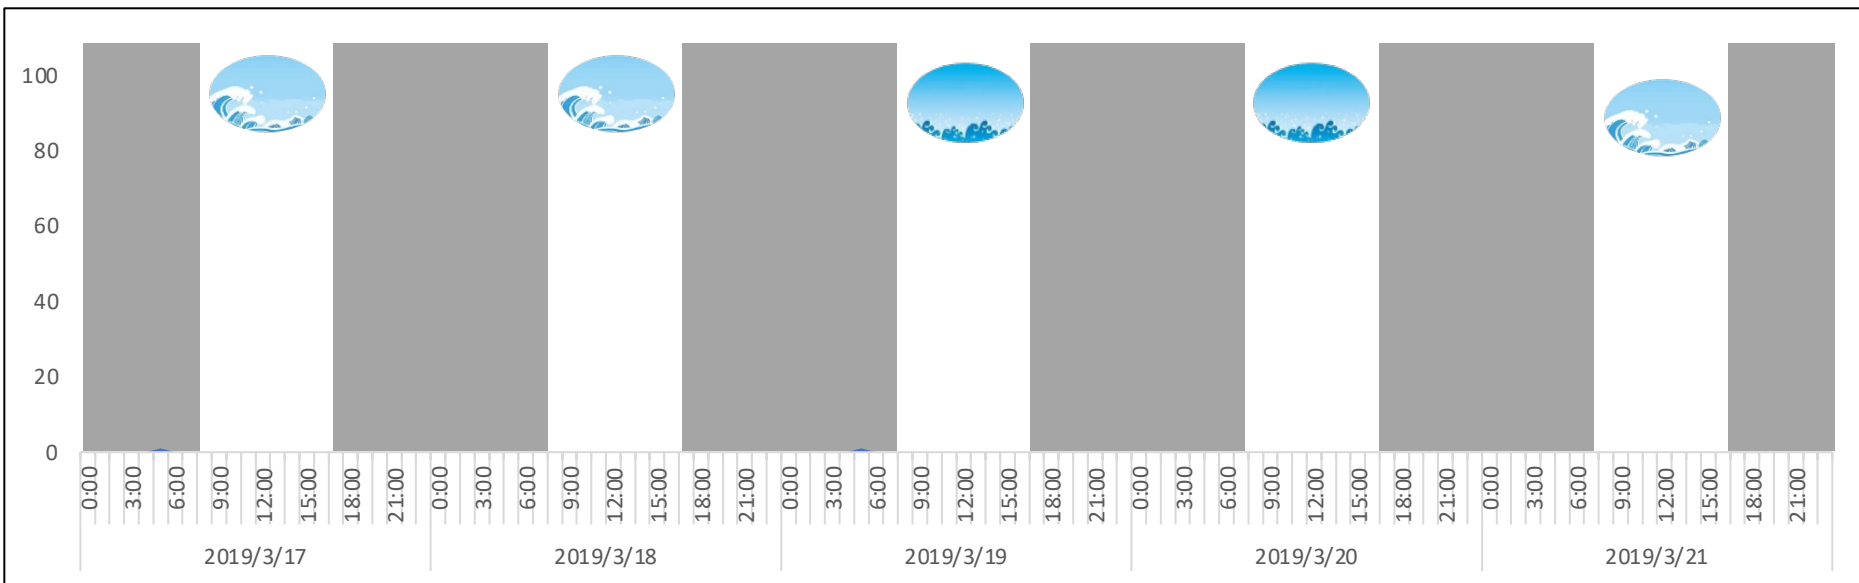

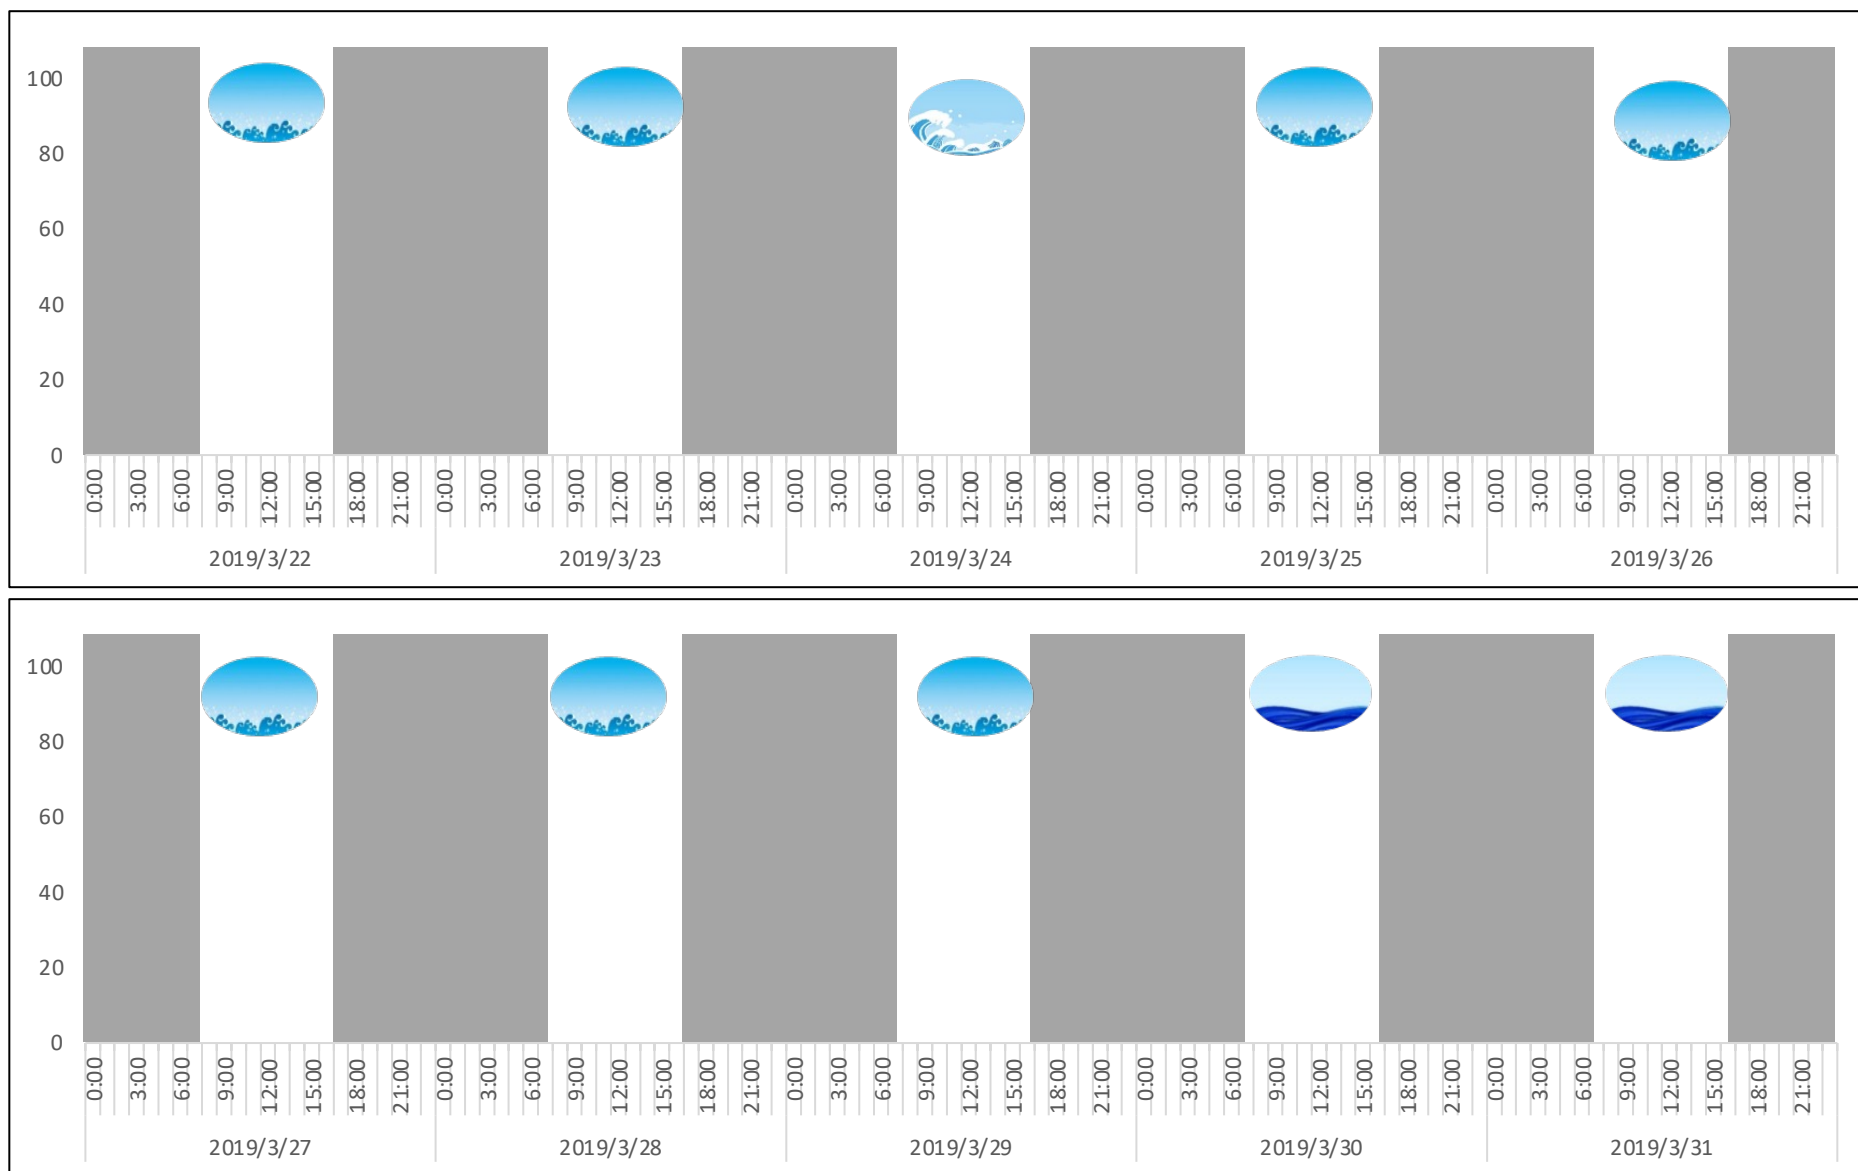

Figure S3. The hourly changes in the number of landed SSLs, weather conditions, and anthropogenic impacts from January 1 to March 31, 2019.
