# Supplementary material for: Human Impact on the Twenty-Four-Hour Patterns of Steller Sea Lions’ Use of a Haulout in Hokkaido, Japan
Source: MDPI journal article supplement (doi:10.3390/ani14091312), 2024-04-27
Supplement: s1 [file s1]

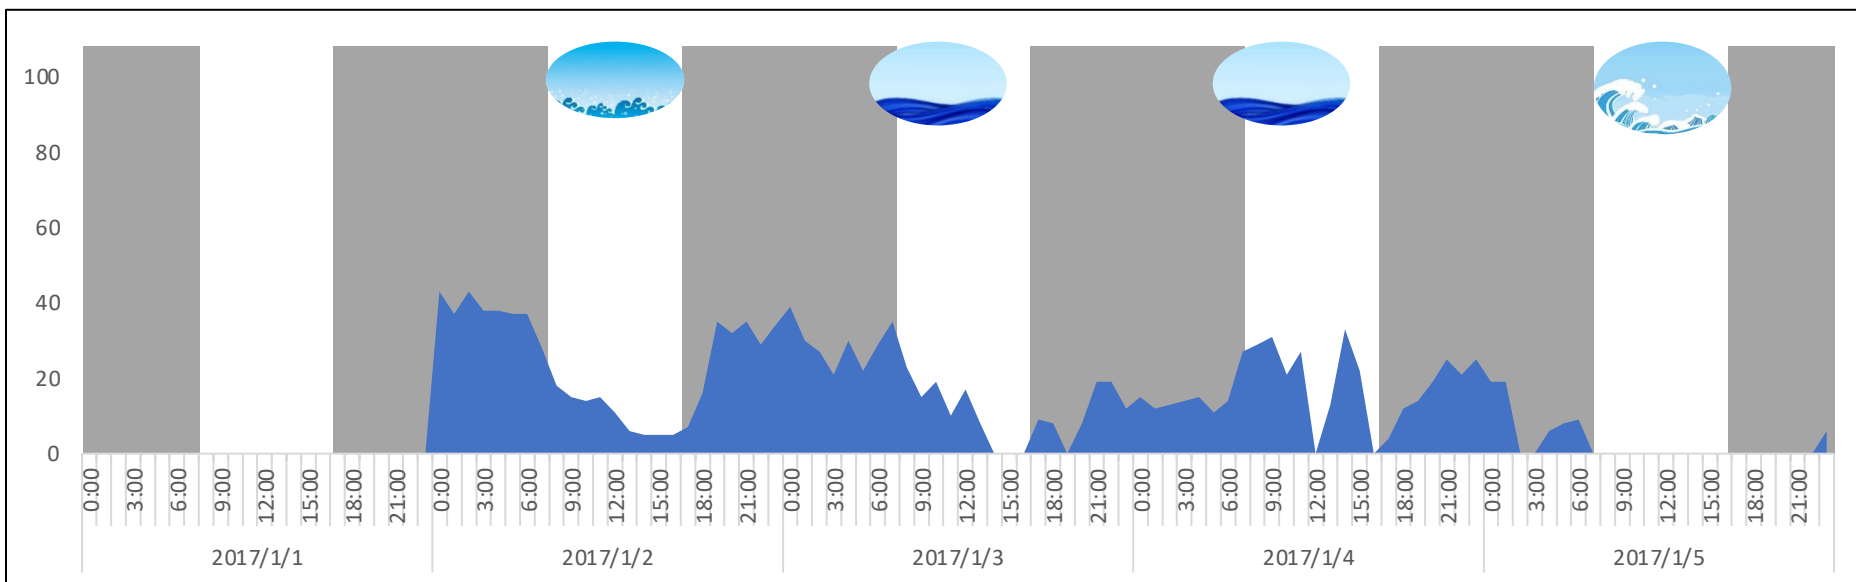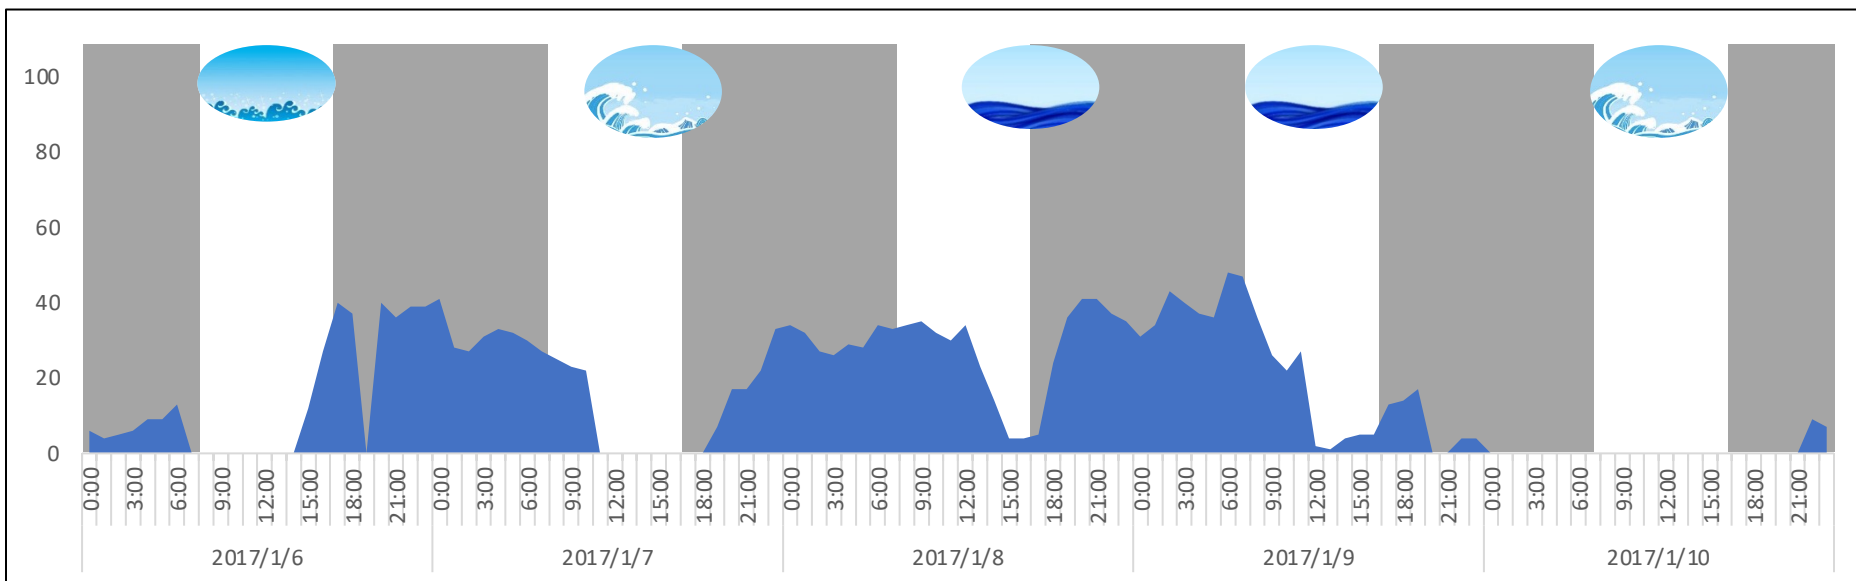

■ : SSL's head    🧑 : Human    🚤 : Boat    Wave Height:    🌊 Low    🌊 Middle    🌊 High    🌊 Extreme  
 ■ : Night    🏹 : Shooting    🏊 : Kayak    (Submerge the haulout site)

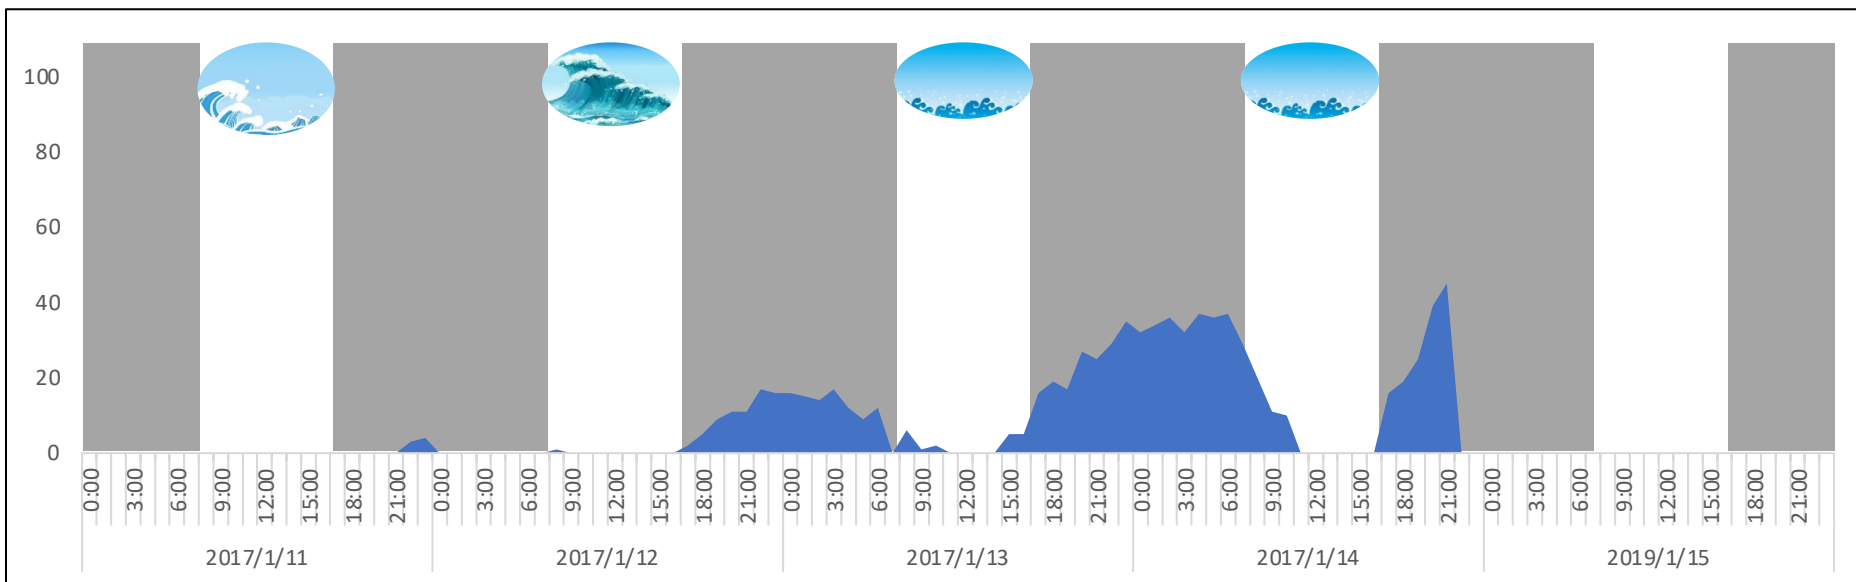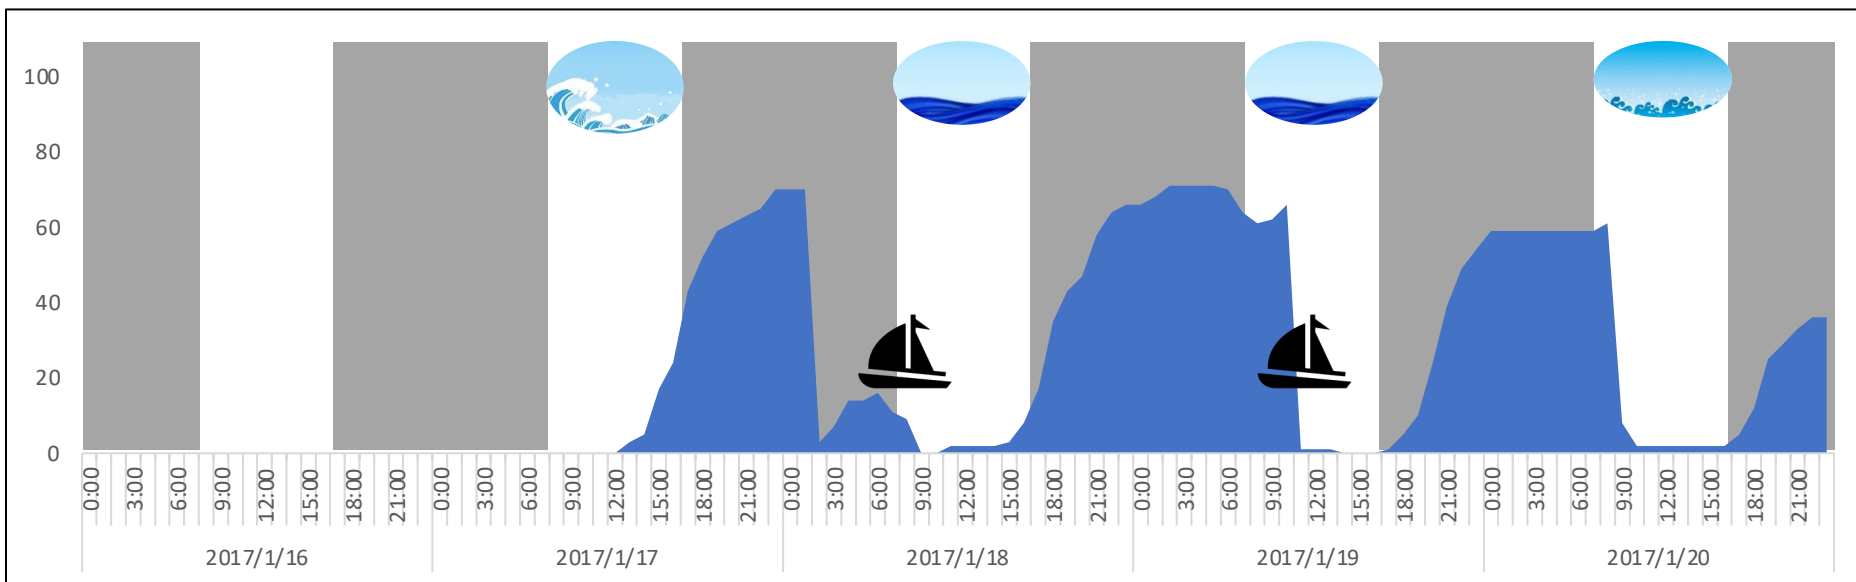

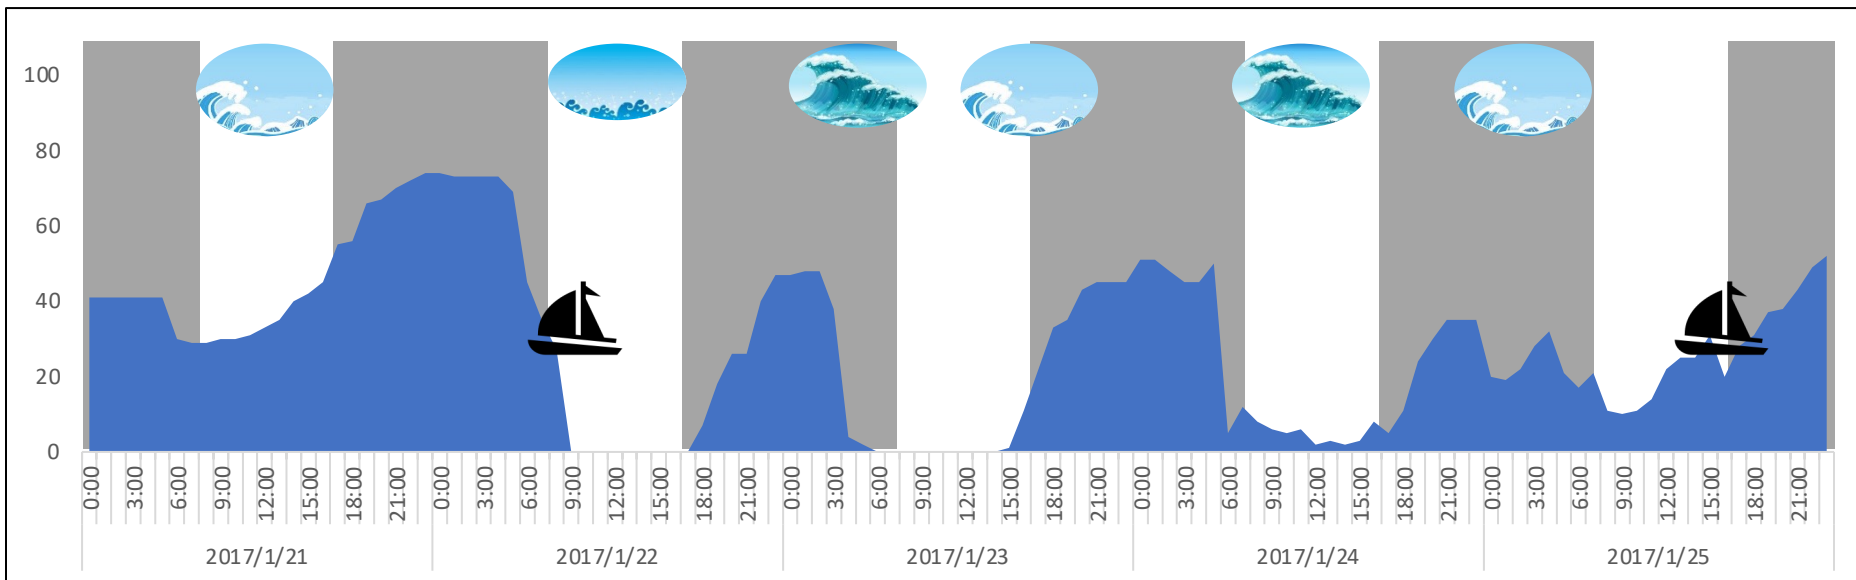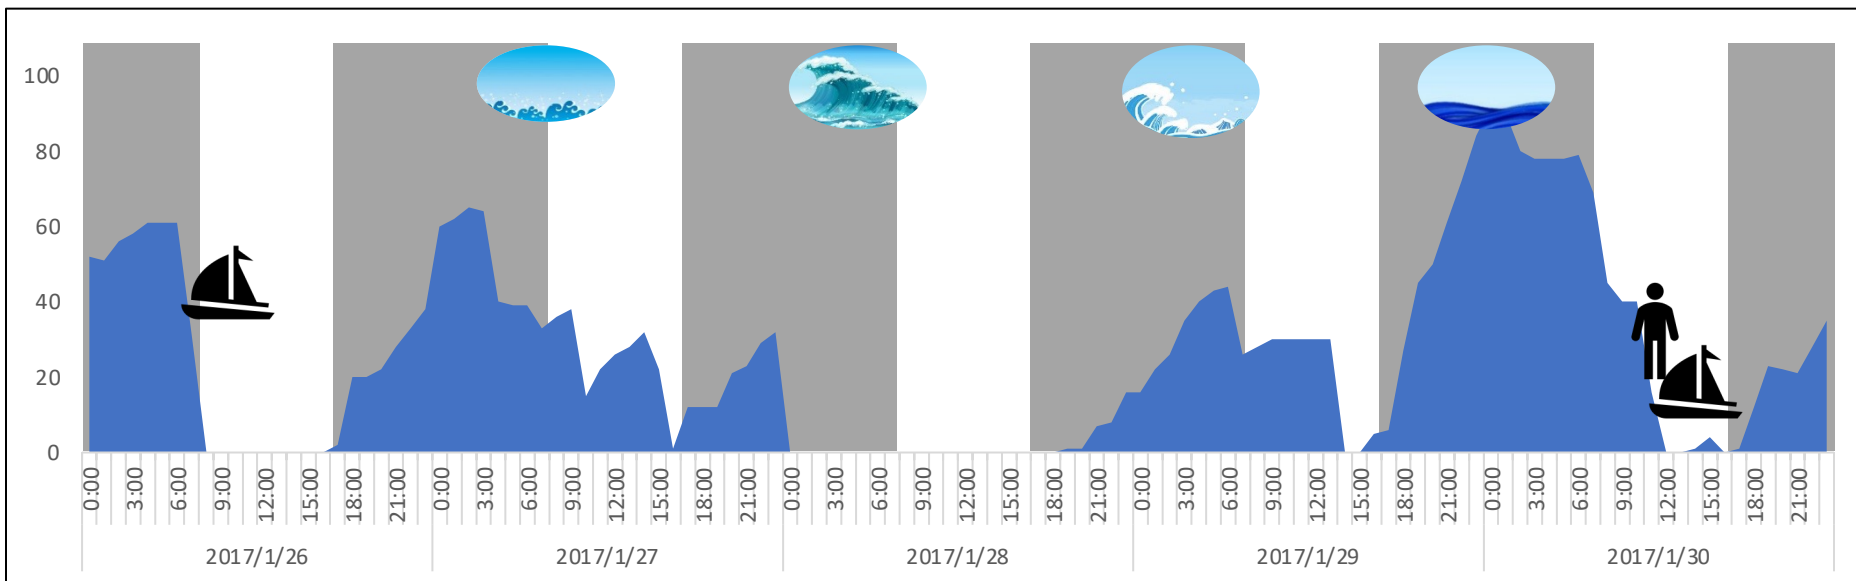

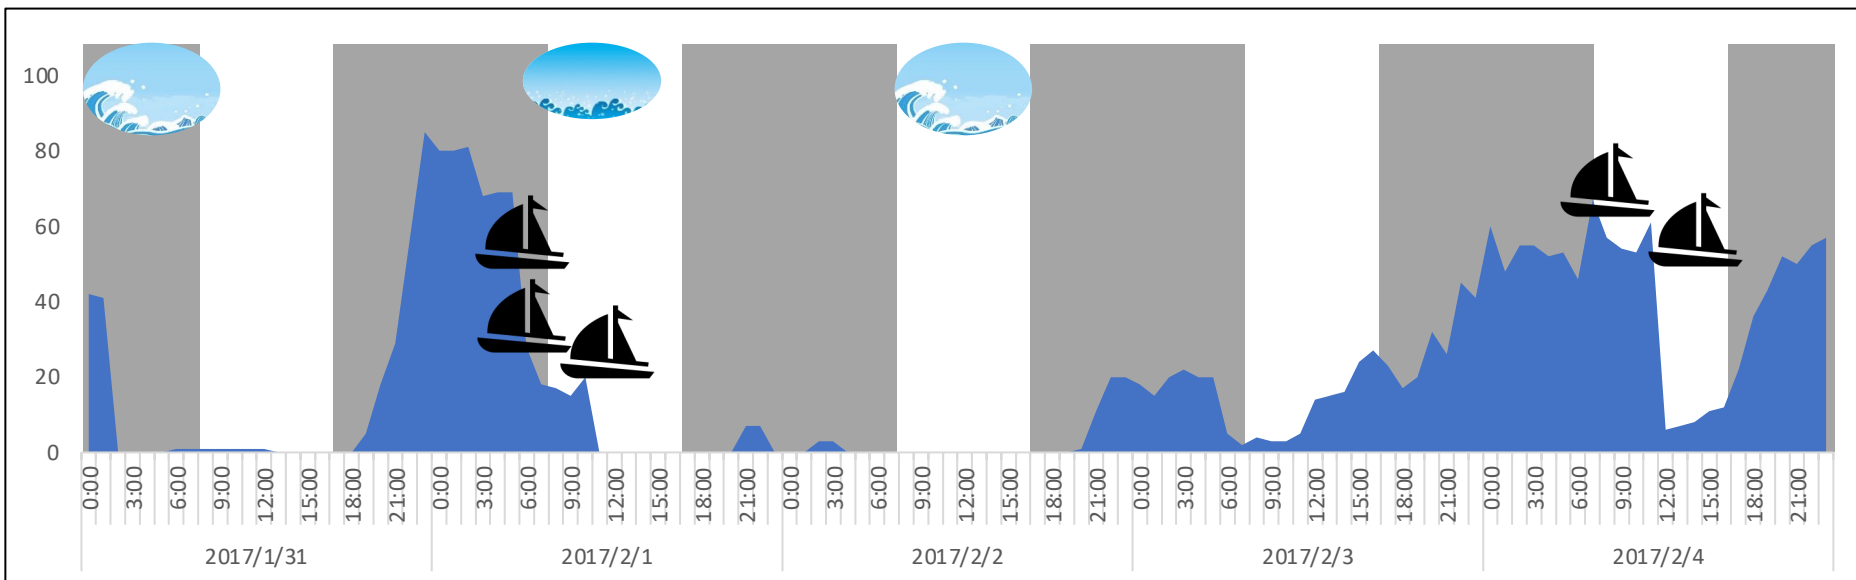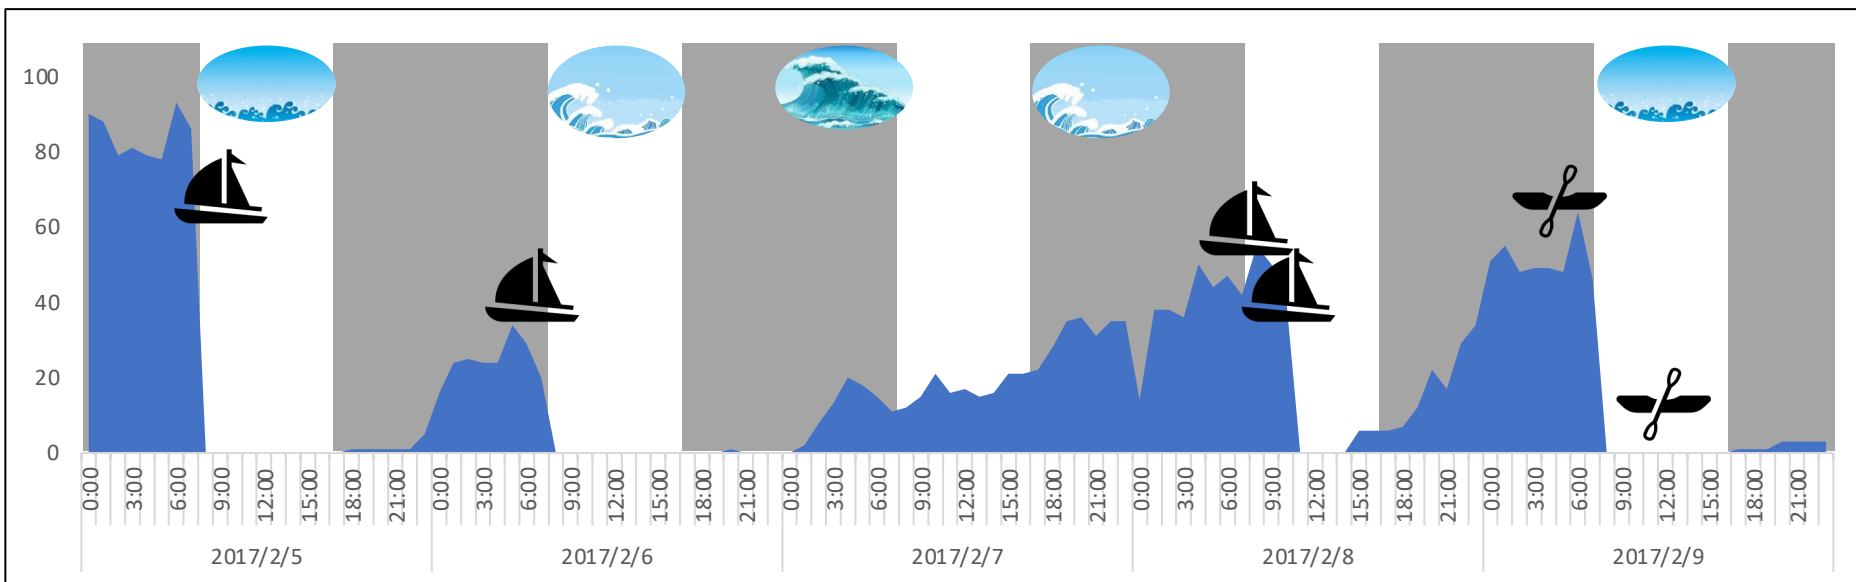

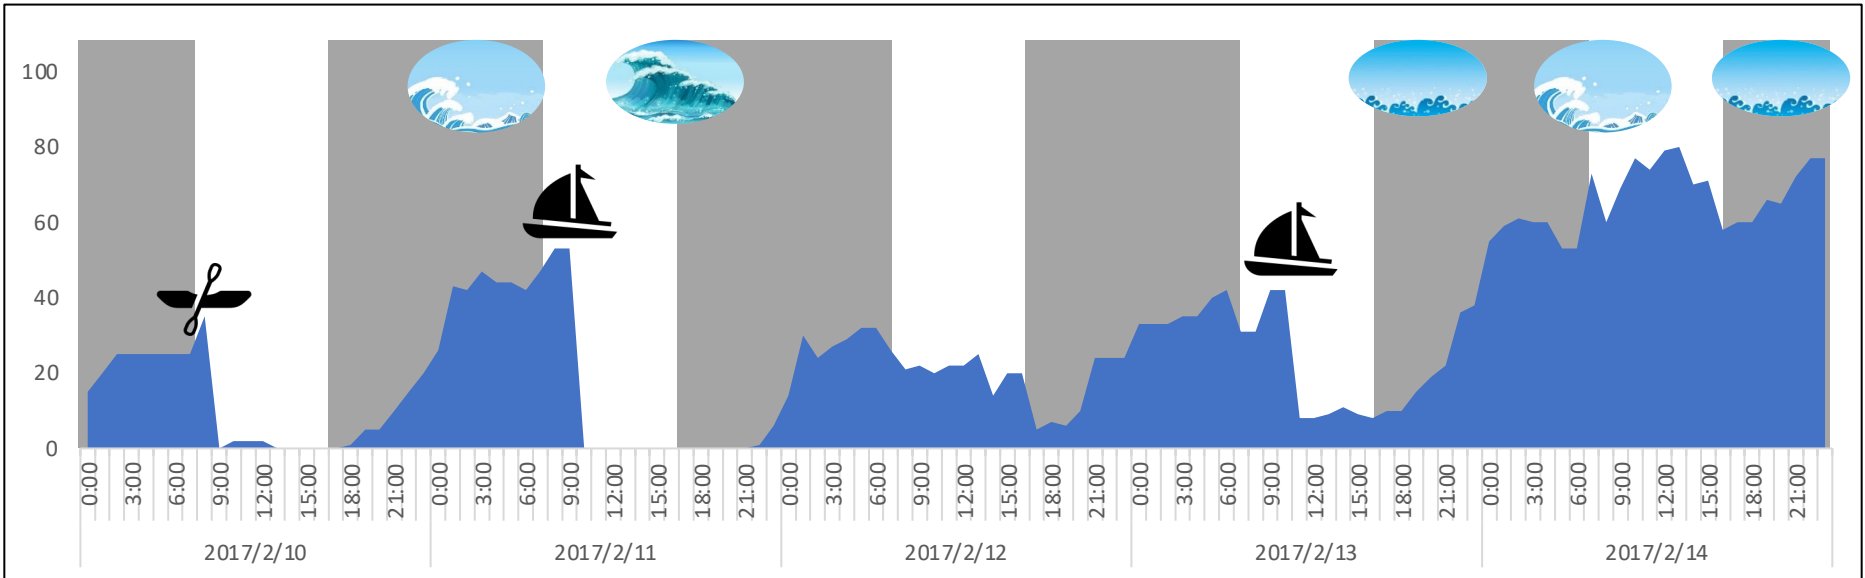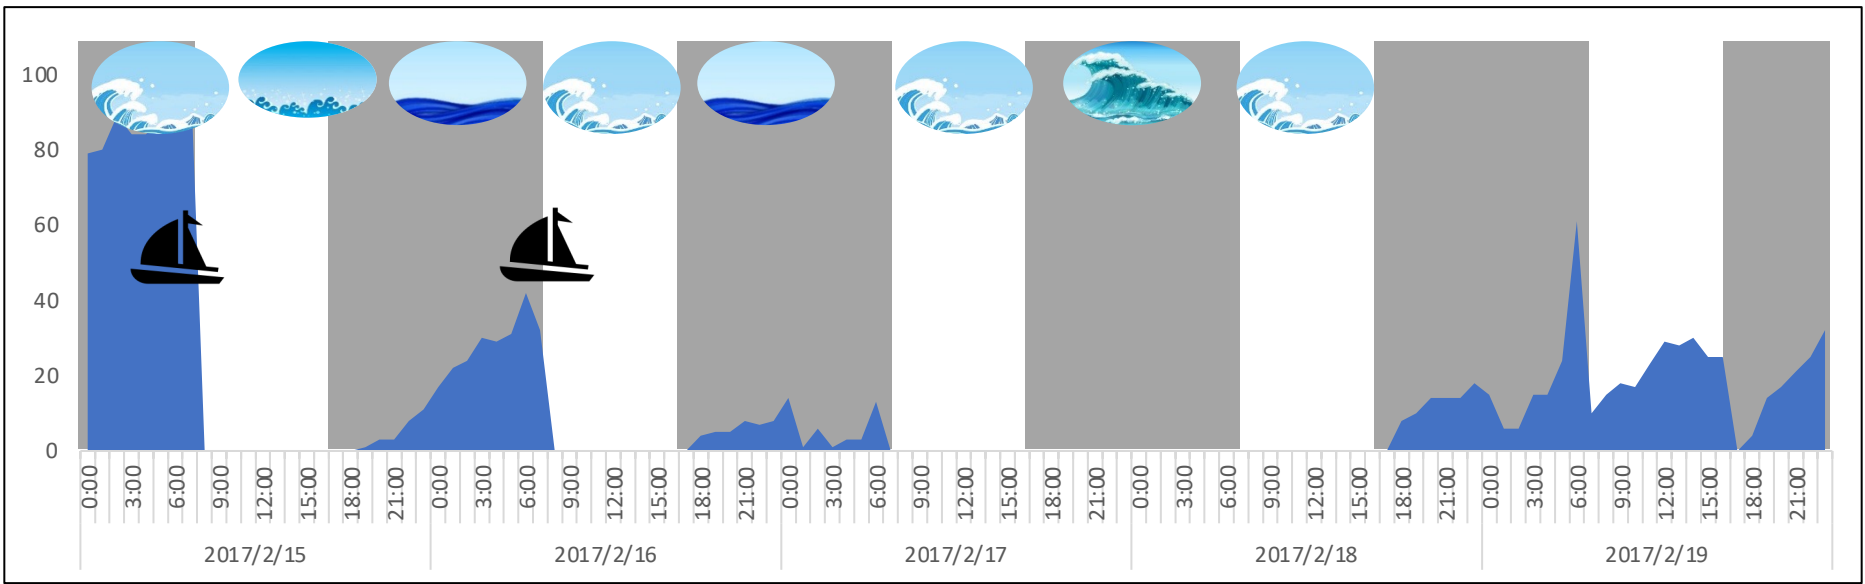

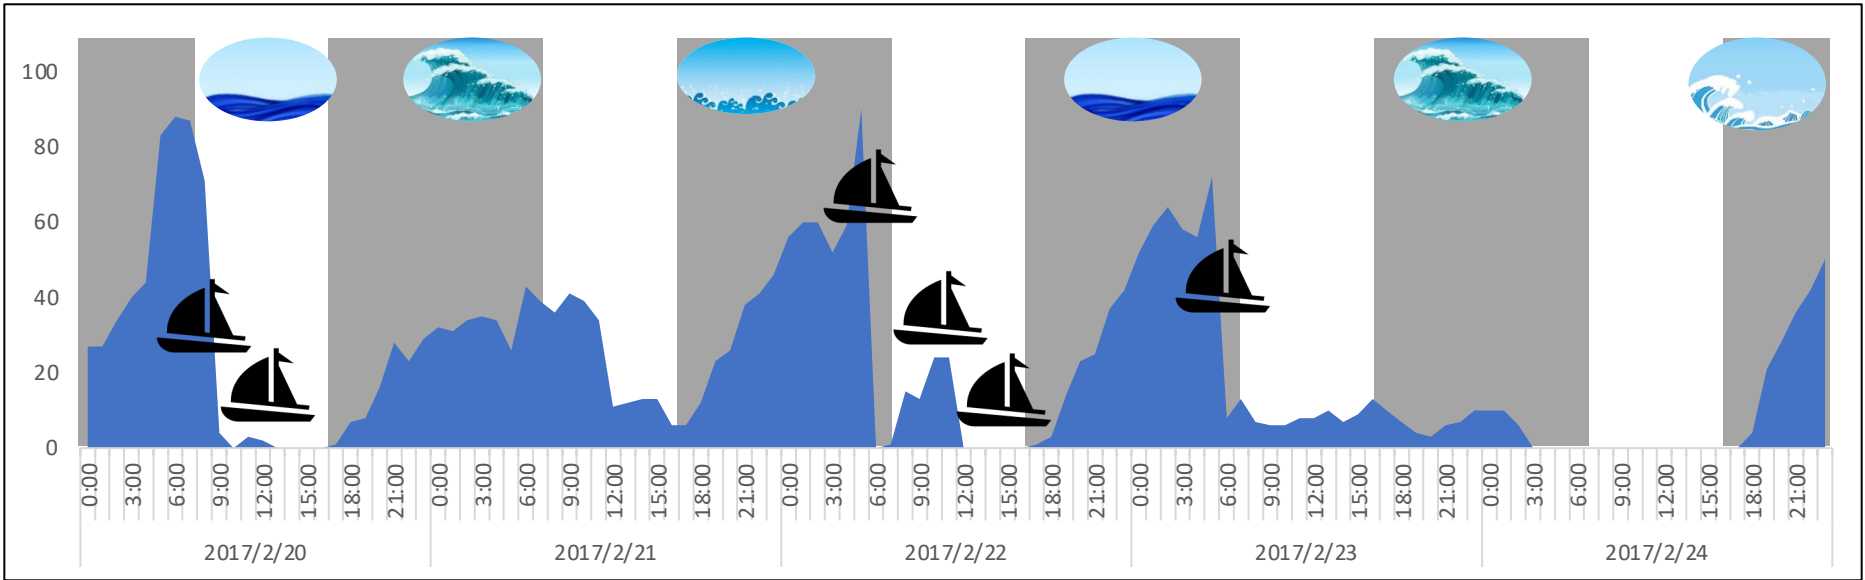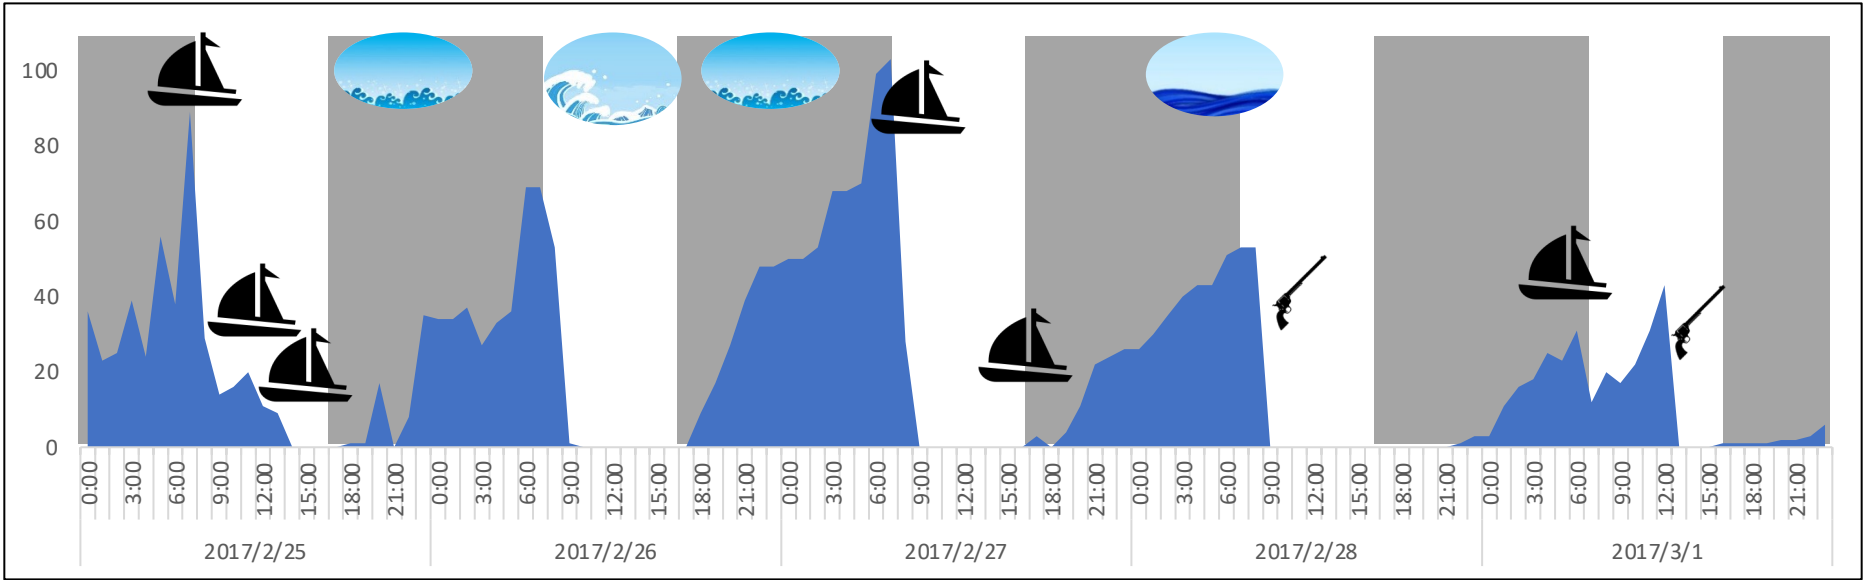

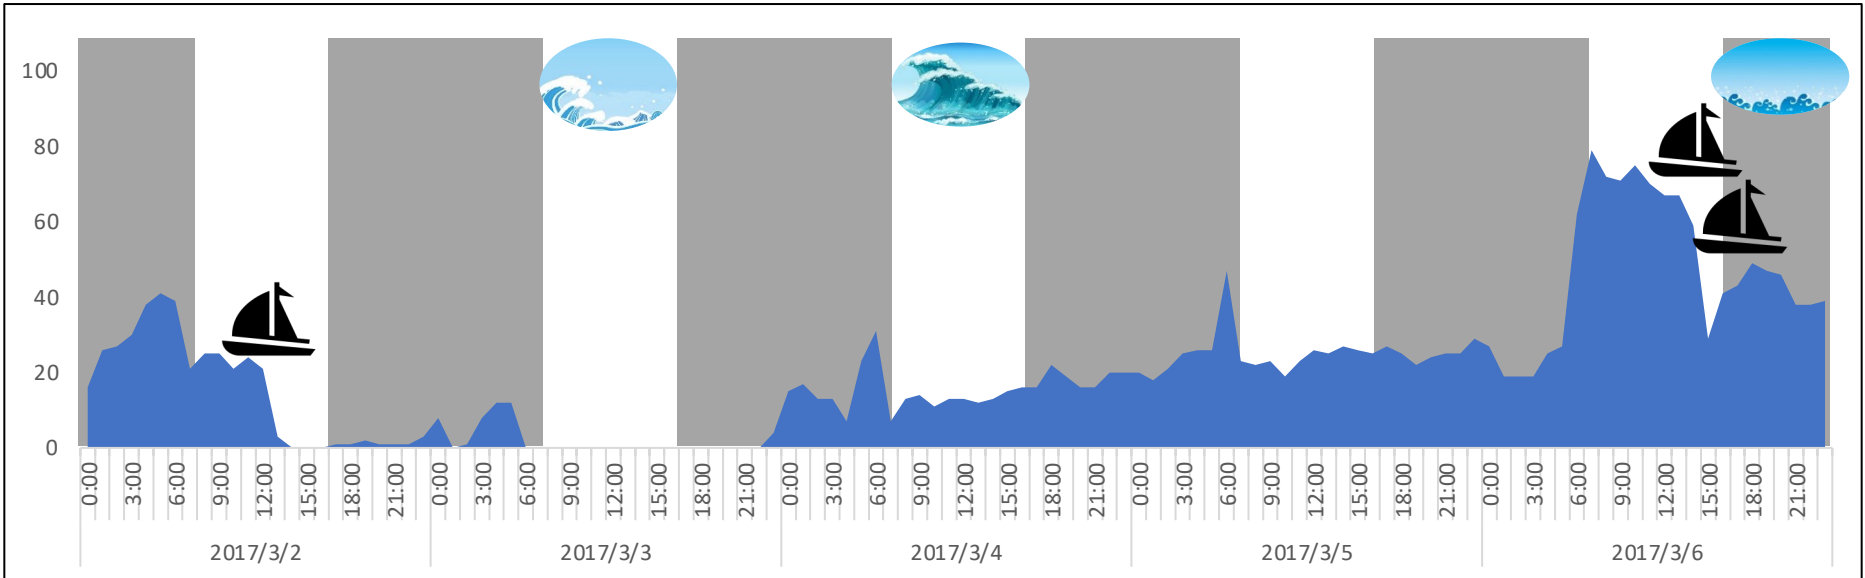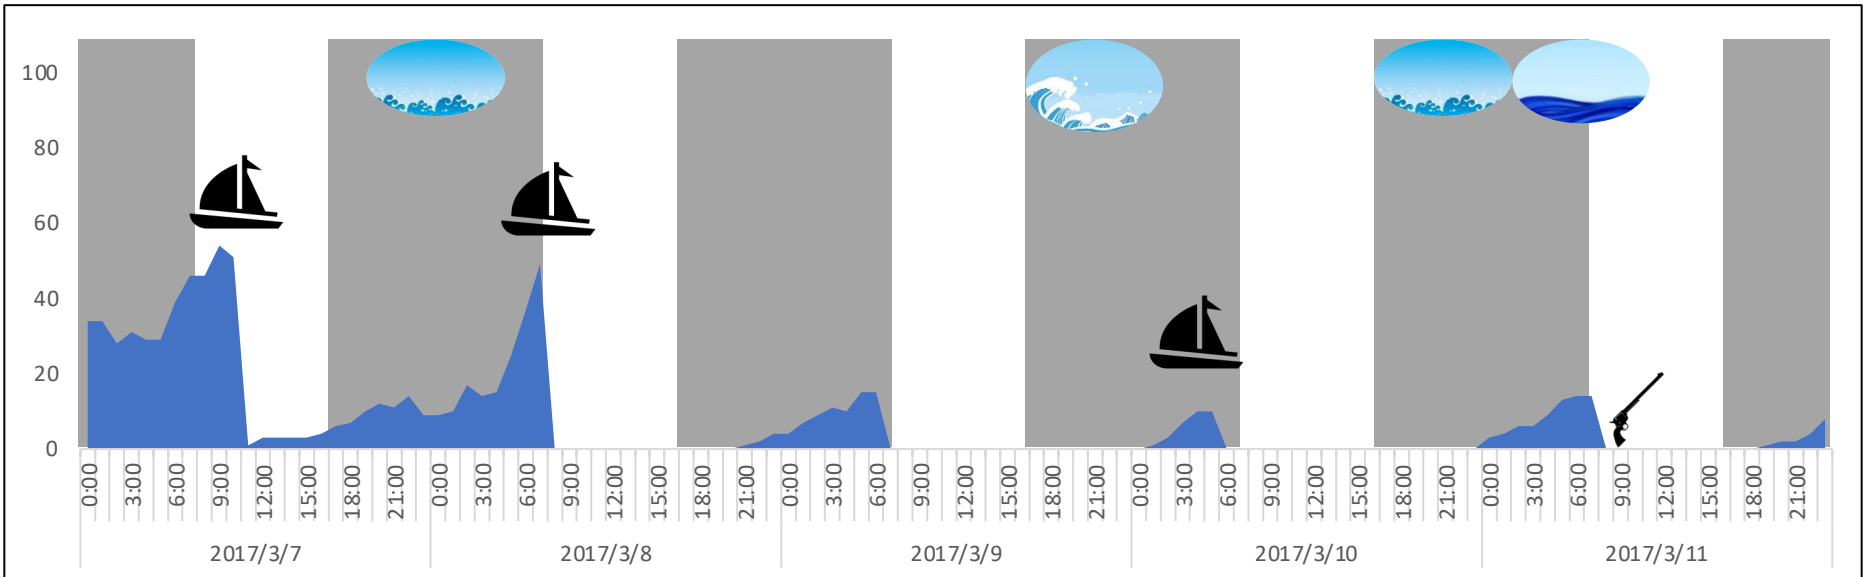





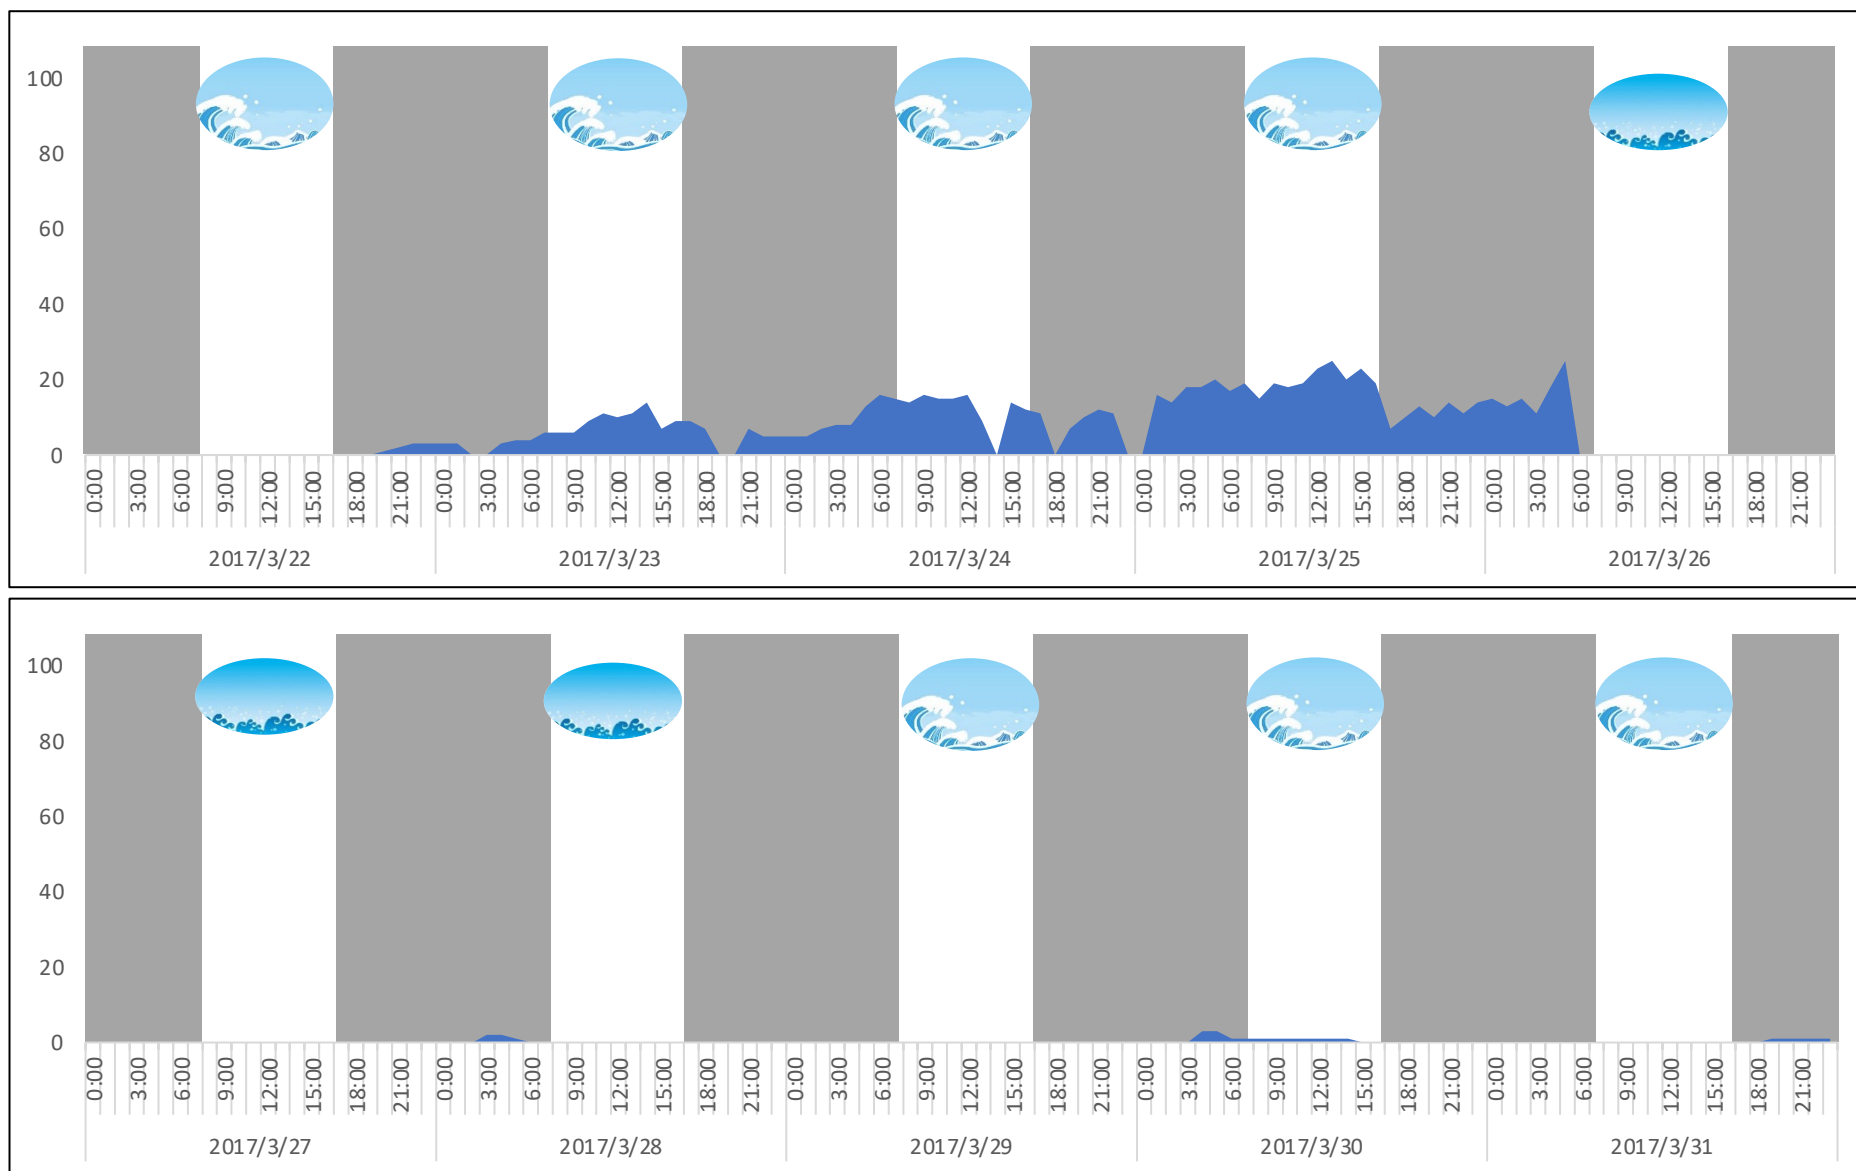

Figure S1. The hourly changes in the number of landed SSLs, weather conditions, and anthropogenic impacts from January 1 to March 31, 2017.
