# Supplementary material for: Human Impact on the Twenty-Four-Hour Patterns of Steller Sea Lions’ Use of a Haulout in Hokkaido, Japan
Source: MDPI journal article supplement (doi:10.3390/ani14091312), 2024-04-27

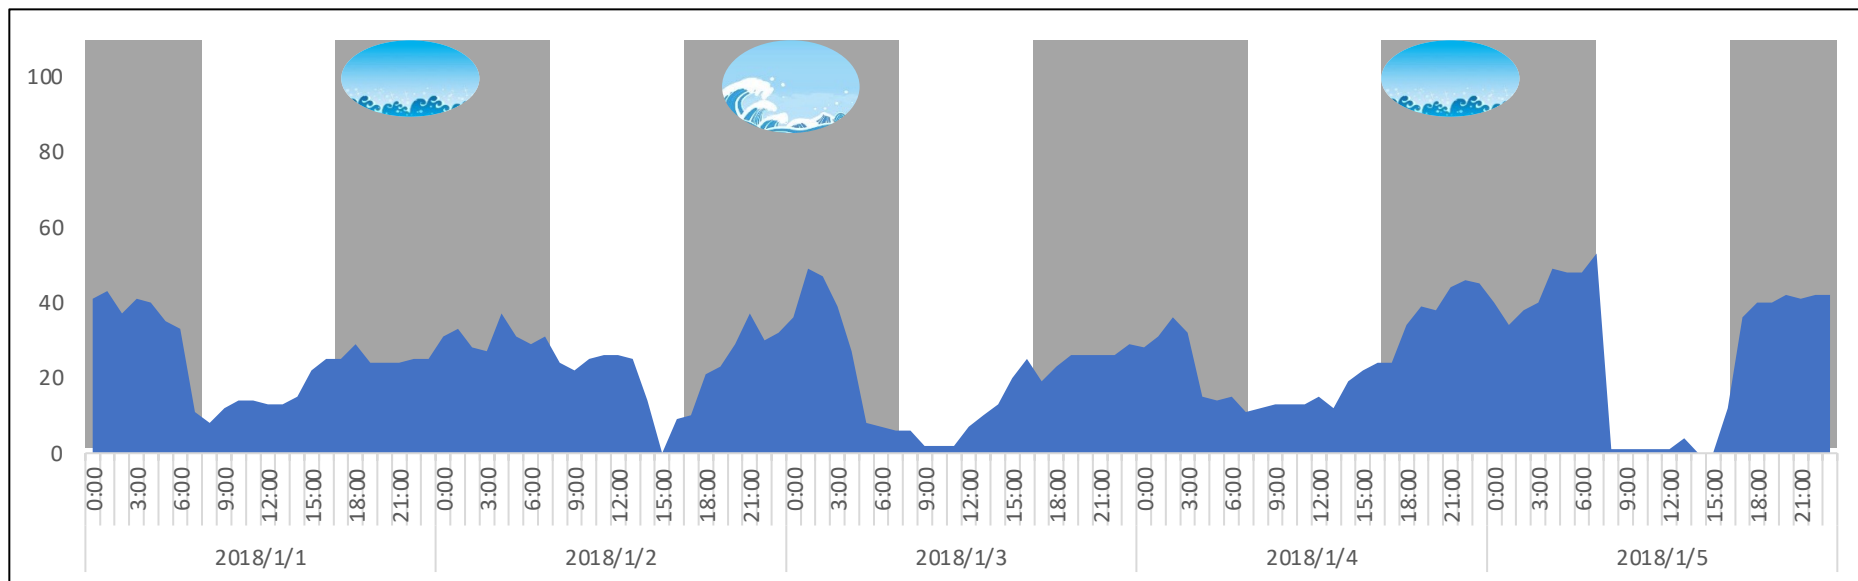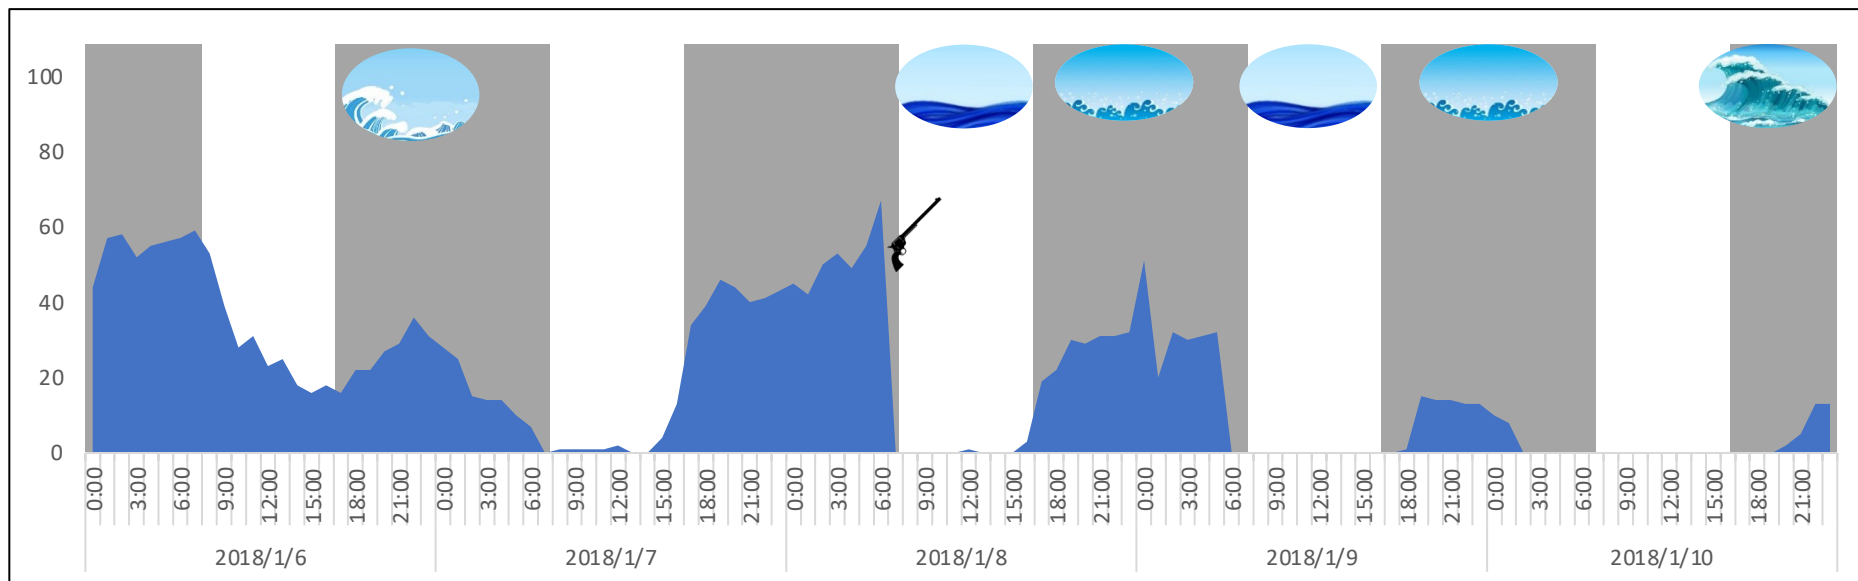

: SSL's head
  : Night
  : Human
  : Boat
  : Kayak
  : Shooting

Wave Height: 
  Low
  Middle
  High
  Extreme  
 (Submerge the haulout site)

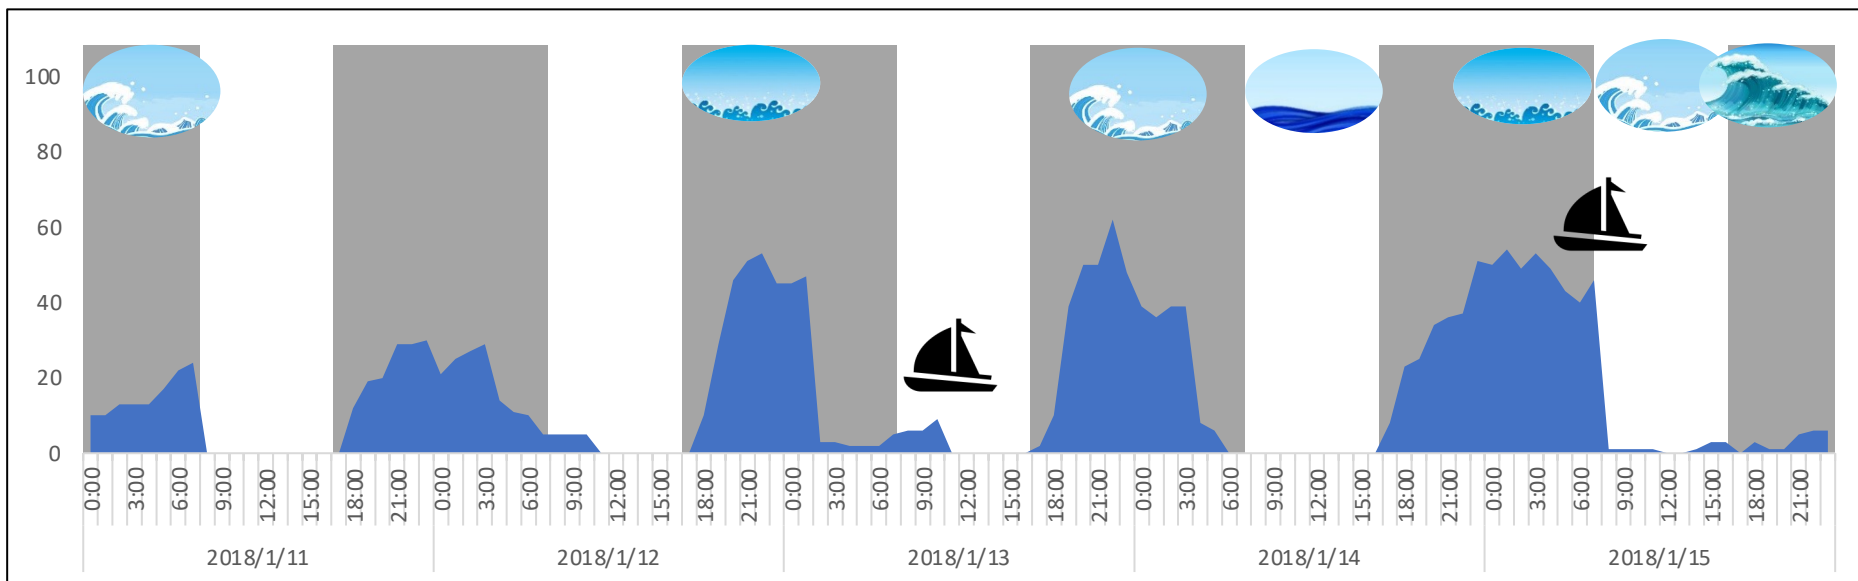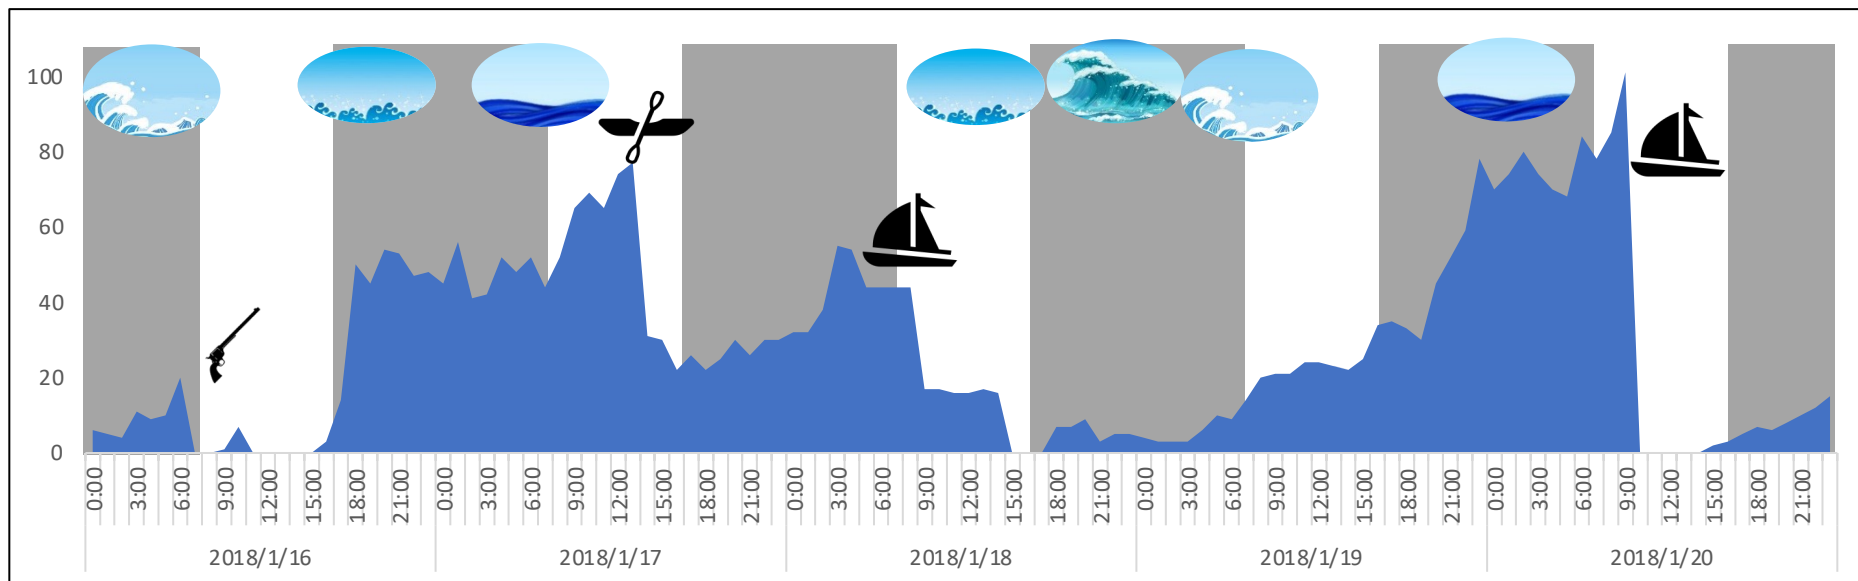

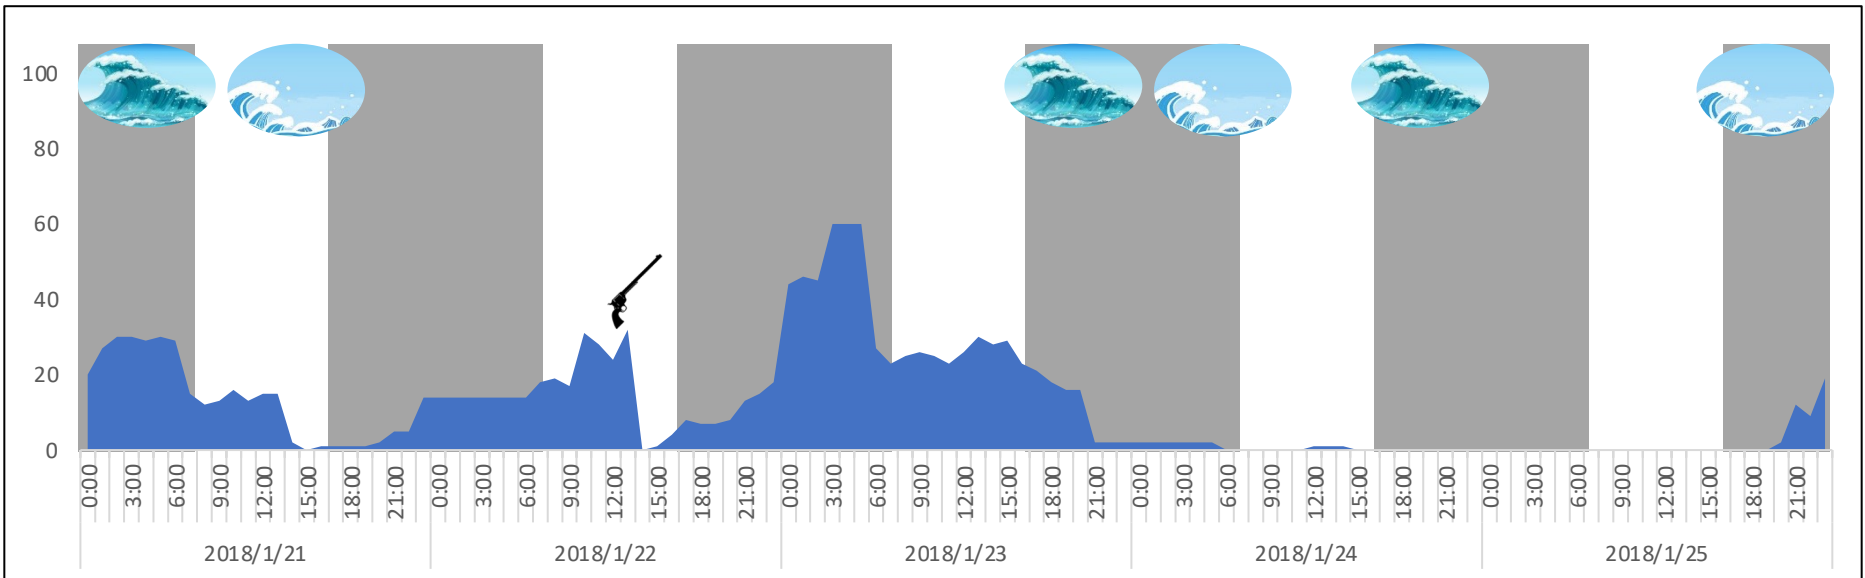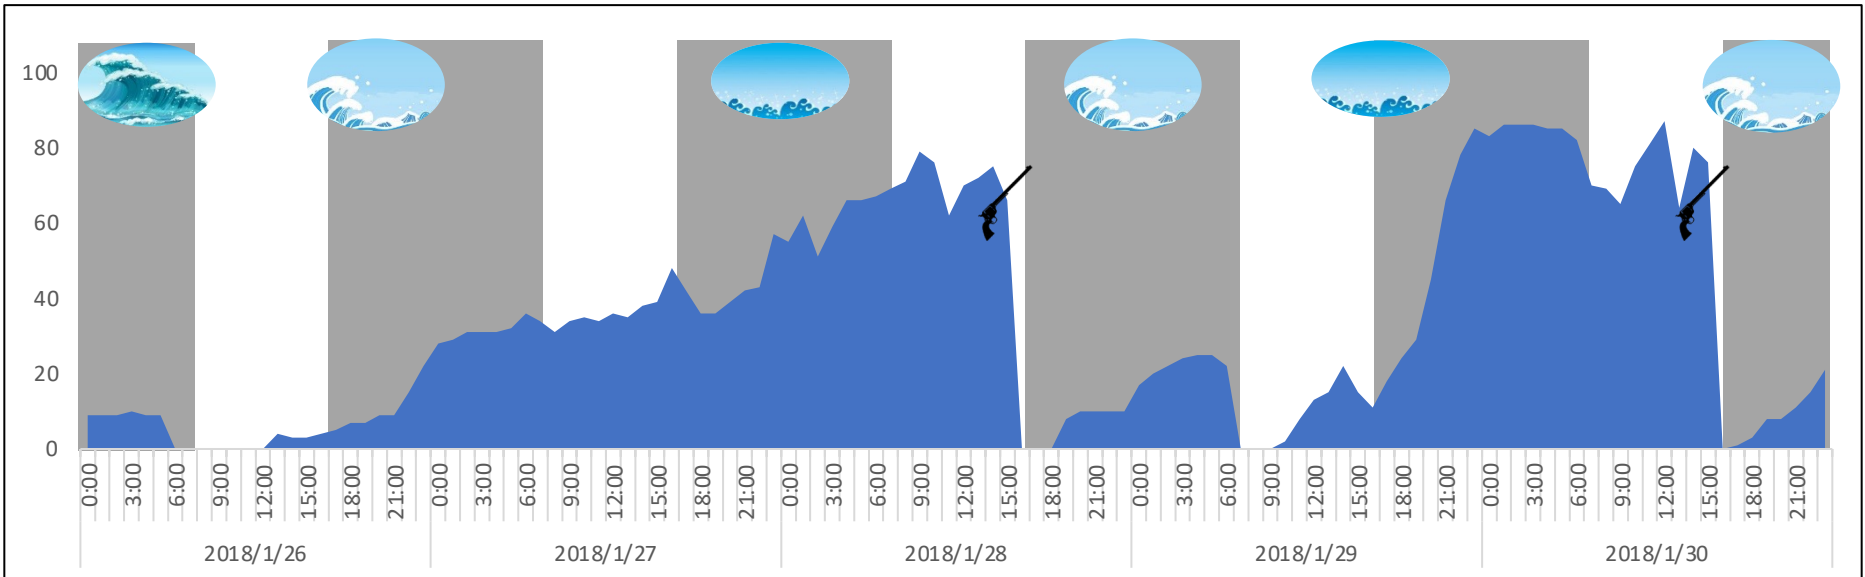

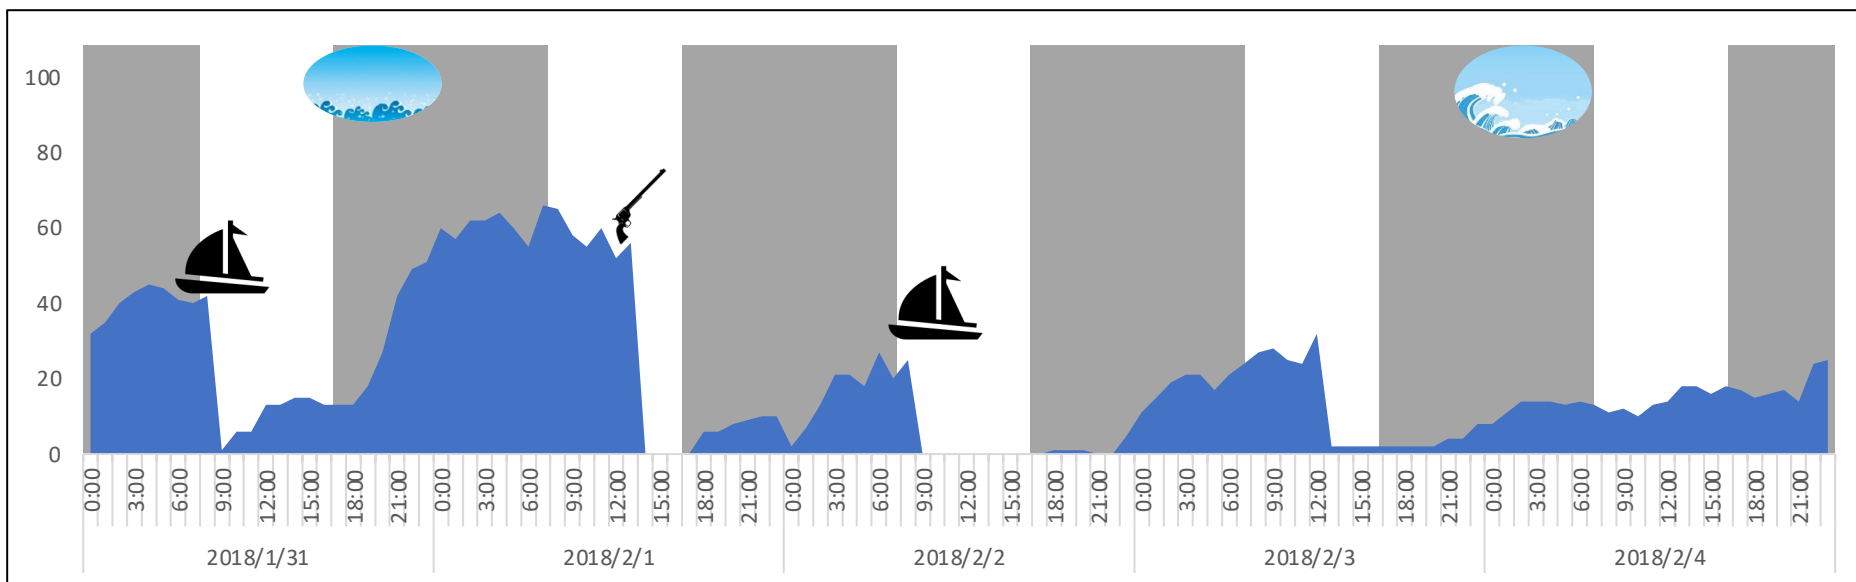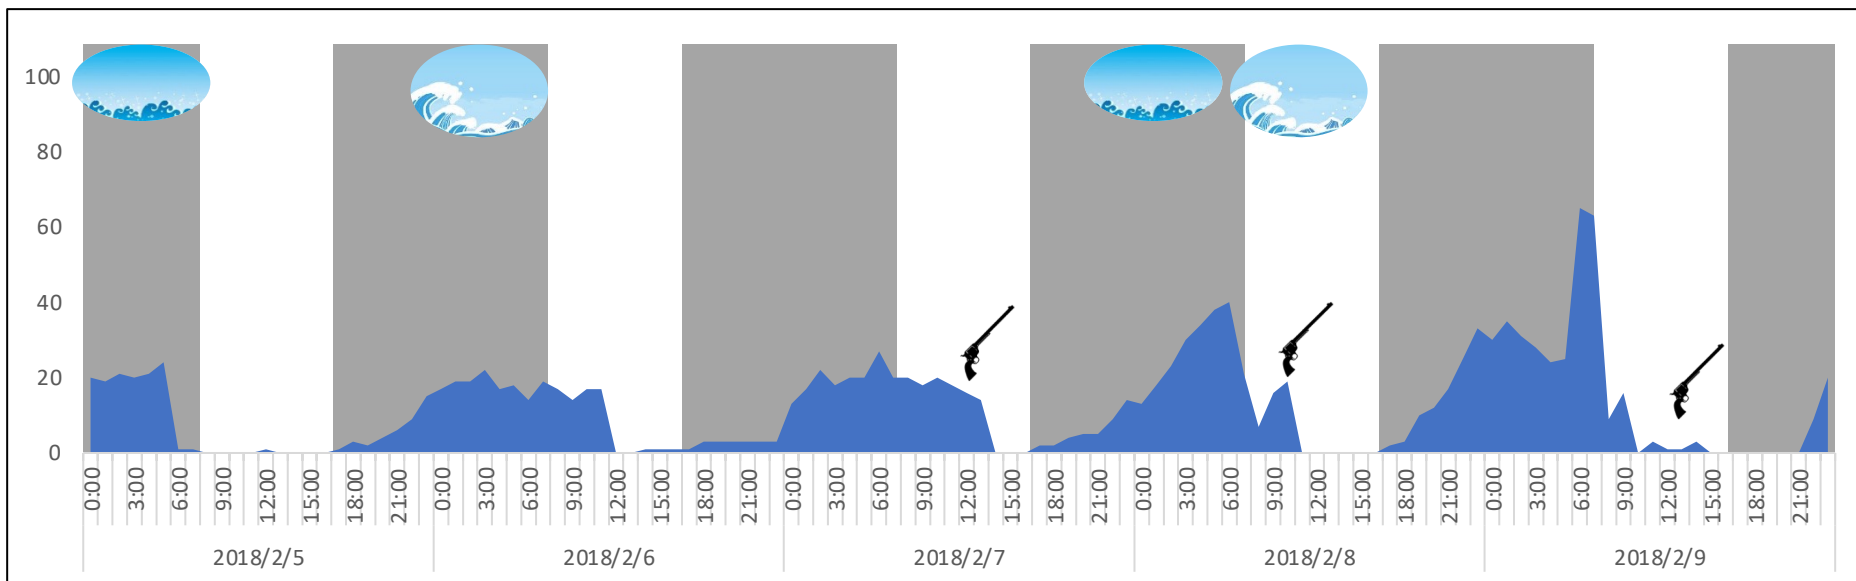



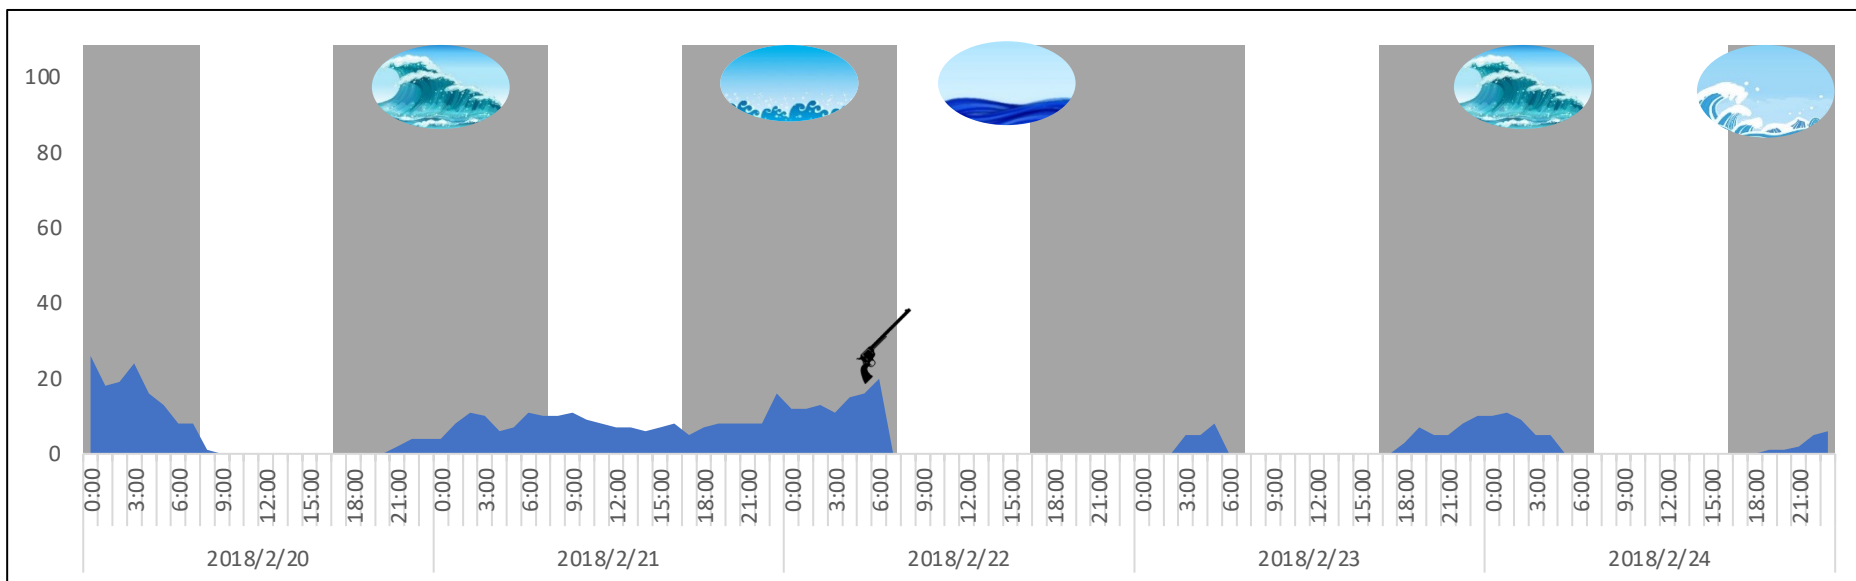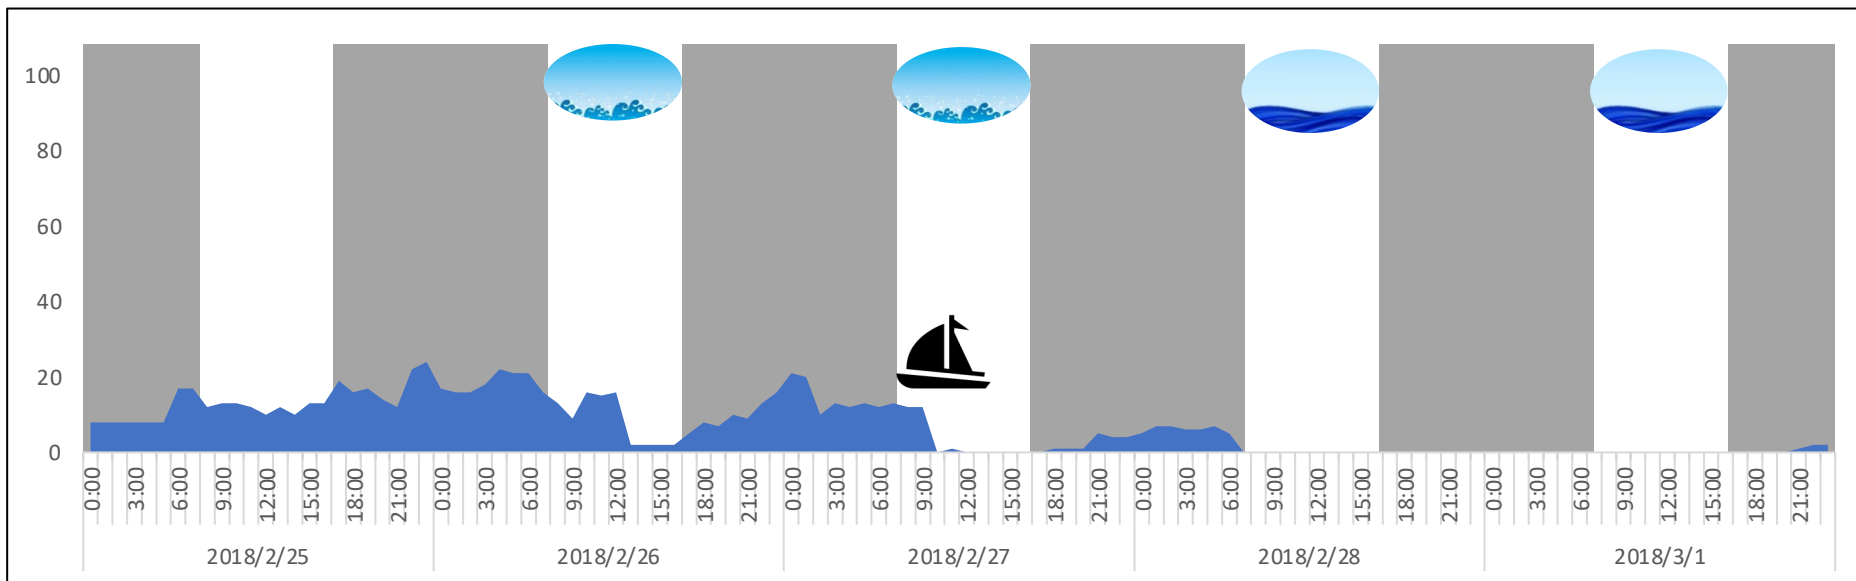

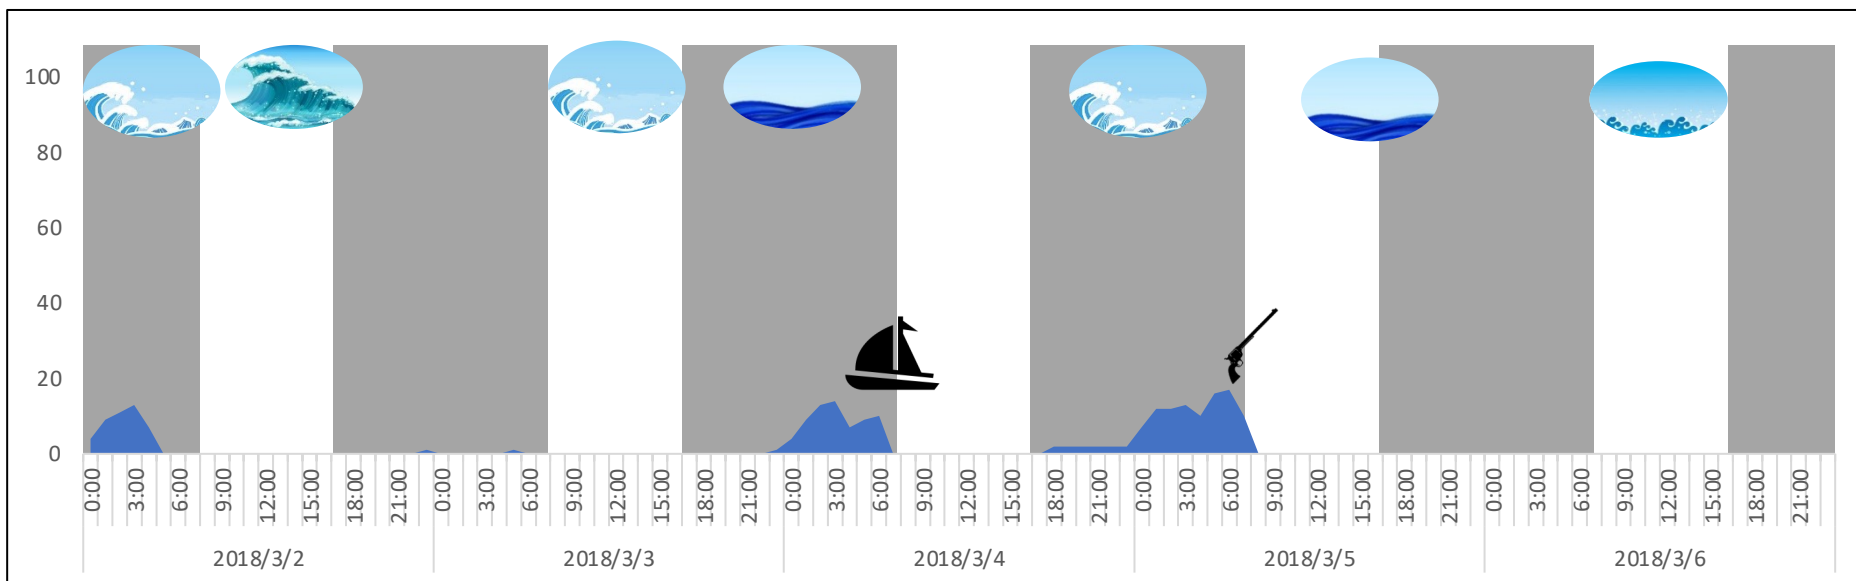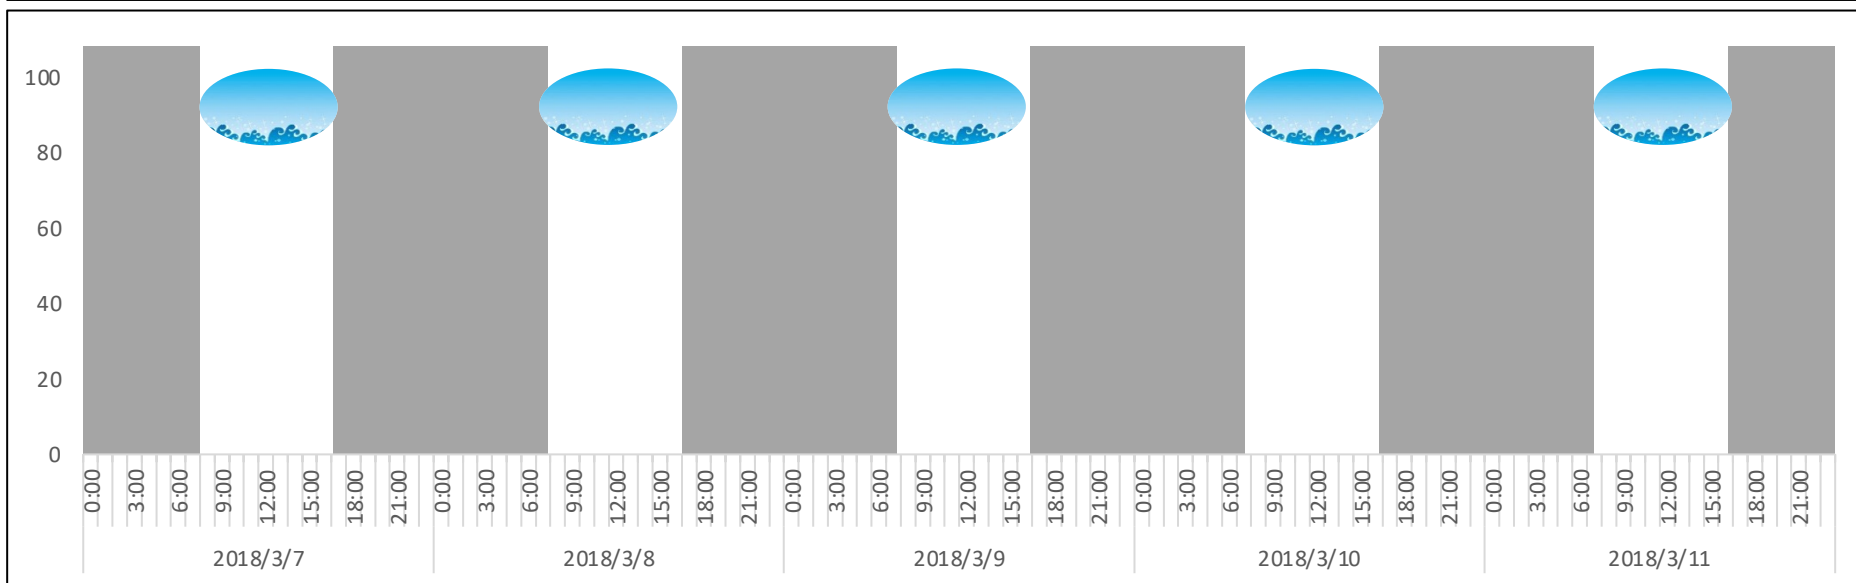

Supplement: s1 [file s1]
