# Supplementary material for: Human Impact on the Twenty-Four-Hour Patterns of Steller Sea Lions’ Use of a Haulout in Hokkaido, Japan
Source: Animals (Basel). 2024 Apr 27;14(9):1312. doi: 10.3390/ani14091312 (PMC11083395; doi:10.3390/ani14091312)
Supplement: Supplementary file 1 [file animals-14-01312-s001.zip]

Archive with 8 entries (8 files):
- ._Figure S1_201701-201703.pdf
- ._Figure S2_201801-201803.pdf
- ._Figure S3_201901-201903.pdf
- ._Table S1.pdf
- Figure S1_201701-201703.pdf
- Figure S2_201801-201803.pdf
- Figure S3_201901-201903.pdf
- Table S1.pdf
